# Supplementary material for: Variations in Grain Traits among Local Rice Varieties Collected More Than Half-Century Ago in Indochinese Countries
Source: MDPI journal article supplement (doi:10.3390/plants12010133), 2022-12-27
Supplement: s1 [file s1]

## **Supplementary Materials**

### **Variations in Grain Traits among Local Rice Varieties Collected More Than Half-Century Ago in Indo–China Countries**

#### **Authors:**

Sathya Lim, Anna Onoda, Chhourn Orn, Hiromu Iwamoto, Ryo Ishikawa, Hiroki Saito, Yutaka Sato and Takashige Ishii

#### **Affiliated institution (correspondence):**

Graduate School of Agricultural Science, Kobe University, 1-1 Rokkodai, Nada-ku, Kobe, Hyogo 657-8501, Japan

#### **Contents**

**Supplementary Figures S1 – S2**

**Supplementary Tables S1 – S8**

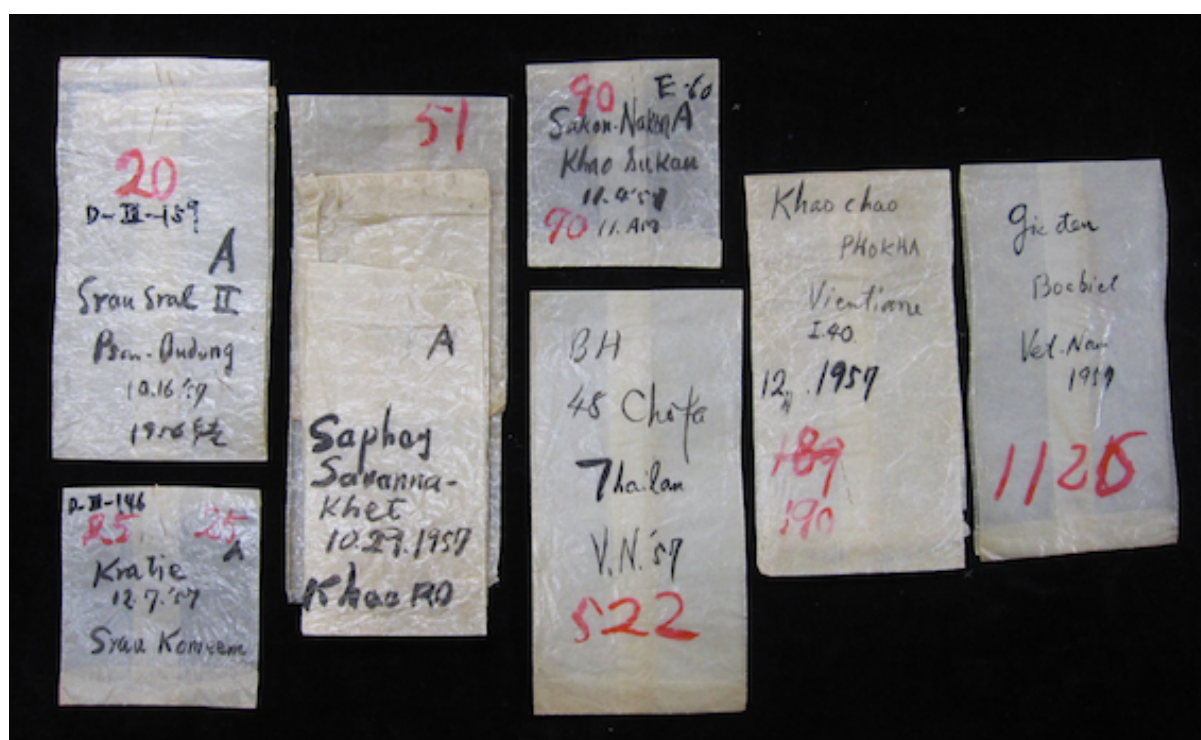

**Supplementary Figure S1.** Original seed envelopes. Prof. Hamada used these envelopes to collect seeds of the rice local varieties in Indo-China countries in 1957.

**A**

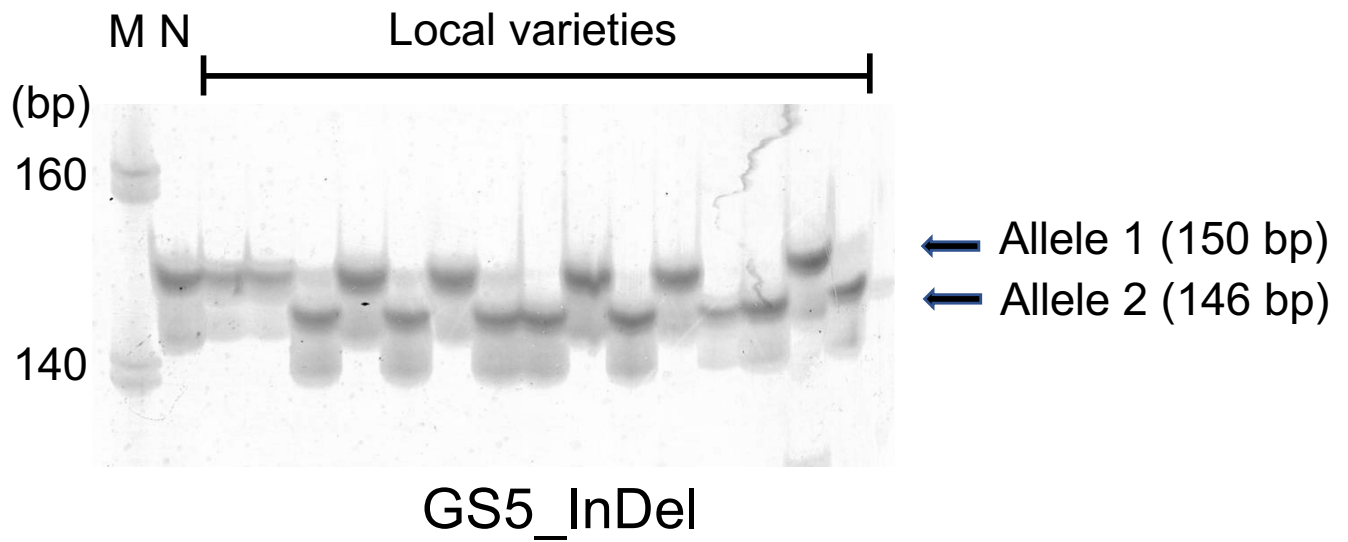

**B**

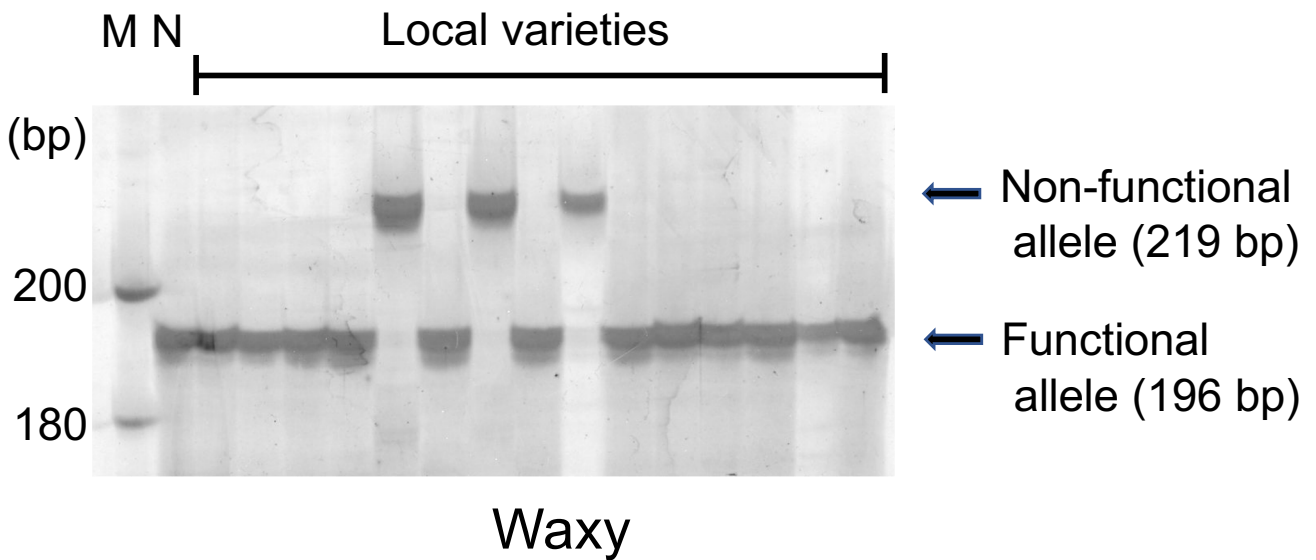

**Supplementary Figure S2.** Polyacrylamide gel band patterns of rice local varieties. **(A)** GS5\_InDel. **(B)** Waxy. M: 20-bp DNA ladder marker. N: Nipponbare. Arrows show the positions of the amplified bands.

**Table S1.** Passport data on 162 local rice varieties collected by Prof. Hamada in Indo-China countries

| Hamada no. <sup>a</sup> | NIG acc. no. <sup>b</sup> | Variety name            | Origin                       | Country  | Additional information   |
|-------------------------|---------------------------|-------------------------|------------------------------|----------|--------------------------|
| 20                      | C6020                     | Srau Sral II            | Psar Oudong                  | Cambodia | Common nonglutinous rice |
| 25                      | C6025                     | Srau Komeem             | Kratie                       | Cambodia | Common nonglutinous rice |
| 51                      | C6051                     | Khao Ro                 | Saphay, Savannakhet          | Laos     | Low Laos                 |
| 76                      | C6076                     | Khao Pomia              | Ban Giyan, Sakon Nakon       | Thailand | -                        |
| 90                      | C6090                     | Khao Sukau              | Sakon Nakon                  | Thailand | -                        |
| 105                     | C6105                     | Khao Naman              | Ban Phatt, Vientiane         | Laos     | Central Laos             |
| 109                     | C6109                     | Unknown                 | Ban Non Heo, Vientiane       | Laos     | Central Laos             |
| 113                     | C6113                     | Khao Puokea             | Vientiane                    | Laos     | Central Laos             |
| 116                     | C6116                     | Khao Deng               | Ban Non Heo, Vientiane       | Laos     | Central Laos             |
| 128                     | C6128                     | Khao Moe                | Ban Tantubou, Vientiane      | Laos     | Central Laos             |
| 143                     | C6143                     | Khao Pongeo             | Ban Kan, Vientiane           | Laos     | Central Laos             |
| 145                     | C6145                     | Khao Lomma              | Vientiane                    | Laos     | Central Laos             |
| 167                     | C6167                     | Khao Khao               | Xiengkhouang                 | Laos     | High Laos                |
| 170                     | C6170                     | Khao Ham                | Xiengkhouang                 | Laos     | High Laos                |
| 179                     | C6179                     | Khao Longma             | Vientiane                    | Laos     | Central Laos             |
| 186                     | C6186                     | Khao Pongseng           | Vientiane                    | Laos     | Central Laos             |
| 190                     | C6190                     | Khao Chao Phokha        | Vientiane                    | Laos     | Central Laos             |
| 199                     | C6199                     | Khao Nio                | Ban Sankhalok, Luang Prabang | Laos     | High Laos                |
| 201                     | C6201                     | Khao Cha Han Tat        | Ban Pha Teng, Vang Vieng     | Laos     | High Laos                |
| 208                     | C6208                     | Khao Chao Noi           | Ban Kaison, Vang Vieng       | Laos     | High Laos                |
| 209                     | C6209                     | Khao Ipoa               | Ban Kaison, Vang Vieng       | Laos     | High Laos                |
| 211                     | C6211                     | Khao Nio                | Ban Kaison, Vang Vieng       | Laos     | High Laos                |
| 216                     | C6216                     | K. Putou                | Ban Kaison, Vang Vieng       | Laos     | High Laos                |
| 217                     | C6217                     | Khao Khaw               | Ban Kaison, Vang Vieng       | Laos     | High Laos                |
| 220                     | C6220                     | Sam Pong                | Battambang                   | Cambodia | Common nonglutinous rice |
| 222                     | C6222                     | Chang Nay Phdao         | Battambang                   | Cambodia | Common nonglutinous rice |
| 234                     | C6234                     | Khoe Soth               | Battambang                   | Cambodia | Common nonglutinous rice |
| 237                     | C6237                     | Banteas Phlouk          | Battambang                   | Cambodia | Common nonglutinous rice |
| 238                     | C6238                     | Phear Cham              | Battambang                   | Cambodia | Common nonglutinous rice |
| 239                     | C6239                     | Phear Cham              | Battambang                   | Cambodia | Common nonglutinous rice |
| 250                     | C6250                     | Kabin                   | Battambang                   | Cambodia | Common nonglutinous rice |
| 252                     | C6252                     | Neang Champa            | Battambang                   | Cambodia | Common nonglutinous rice |
| 254                     | C6254                     | Neang Leak              | Battambang                   | Cambodia | Common nonglutinous rice |
| 255                     | C6255                     | Samsep Teao             | Battambang                   | Cambodia | Common nonglutinous rice |
| 256                     | C6256                     | Neang Ourk              | Battambang                   | Cambodia | Common nonglutinous rice |
| 260                     | C6260                     | Sugnuon Thong           | Battambang                   | Cambodia | Common nonglutinous rice |
| 265                     | C6265                     | Khao Luong              | Battambang                   | Cambodia | Common nonglutinous rice |
| 318                     | C6318                     | Chaeung Sromoch         | Battambang                   | Cambodia | Rice in dry region       |
| 393                     | C6393                     | Poik Kour               | Tonle Sap                    | Cambodia | Floating rice            |
| 429                     | C6429                     | Kaotot Long             | Battambang                   | Cambodia | Common nonglutinous rice |
| 431                     | C6431                     | Nam Dork Hai            | Battambang                   | Cambodia | Common nonglutinous rice |
| 433                     | C6433                     | K.S.T. I                | Battambang                   | Cambodia | Common nonglutinous rice |
| 443                     | C6443                     | Khao Horoy              | Battambang                   | Cambodia | Common nonglutinous rice |
| 444                     | C6444                     | Neang Champa            | Battambang                   | Cambodia | Common nonglutinous rice |
| 446                     | C6446                     | Kao Soi No.70           | -                            | Thailand | -                        |
| 458                     | C6458                     | Kao Taou No. 212        | -                            | Thailand | -                        |
| 463                     | C6463                     | Ham No. 48              | -                            | Thailand | -                        |
| 467                     | C6467                     | Hissitout Venaut        | -                            | Thailand | -                        |
| 468                     | C6468                     | Hai Katium (Haidi)      | -                            | Thailand | -                        |
| 470                     | C6470                     | Kao Chu Bai No.91       | -                            | Thailand | -                        |
| 473                     | C6473                     | Kweopa Sak No. 353      | -                            | Thailand | -                        |
| 475                     | C6475                     | Lueng Leng Long No. 192 | -                            | Thailand | -                        |
| 476                     | C6476                     | Kao Chu Bai No.186      | -                            | Thailand | -                        |
| 477                     | C6477                     | Lueug Ou                | -                            | Thailand | -                        |
| 478                     | C6478                     | Kmer Tia No. 119        | -                            | Thailand | -                        |
| 480                     | C6480                     | Khao Pudas              | -                            | Thailand | -                        |
| 481                     | C6481                     | Bang Pra                | -                            | Thailand | -                        |
| 483                     | C6483                     | Khao Tot Long No.277    | -                            | Thailand | -                        |
| 485                     | C6485                     | Khao Kleo No. 338       | -                            | Thailand | -                        |
| 489                     | C6489                     | Champa Kao No. 370      | -                            | Thailand | -                        |
| 494                     | C6494                     | Lueng Long No. 334      | -                            | Thailand | -                        |
| 496                     | C6496                     | Bang Pra No.287         | -                            | Thailand | -                        |
| 501                     | C6501                     | Chek Ruang No. 379      | -                            | Thailand | -                        |
| 507                     | C6507                     | Khao Vang Nui No. 322   | -                            | Thailand | -                        |
| 514                     | C6514                     | Quang Ngeon             | -                            | Thailand | -                        |
| 518                     | C6518                     | Khao Tot Long           | -                            | Thailand | -                        |
| 521                     | C6521                     | Pey Keo                 | -                            | Thailand | -                        |
| 522                     | C6522                     | Chofa                   | -                            | Thailand | -                        |
| 527                     | C6527                     | Khao Tot Long           | -                            | Thailand | -                        |
| 528                     | C6528                     | Kong Chud No. 357       | -                            | Thailand | -                        |
| 531                     | C6531                     | Champa Tong No. 54      | -                            | Thailand | -                        |
| 535                     | C6535                     | Champada                | -                            | Thailand | -                        |
| 643                     | C6643                     | Snek Chek               | -                            | Cambodia | Common nonglutinous rice |
| 644                     | C6644                     | Neang Tar Changvar      | Takeo                        | Cambodia | Common nonglutinous rice |
| 645                     | C6645                     | Neang Pov               | Beng Phlong                  | Cambodia | Common nonglutinous rice |
| 646                     | C6646                     | Sambok Ang Krang        | -                            | Cambodia | Common nonglutinous rice |
| 650                     | C6650                     | Traneup Kandar          | -                            | Cambodia | Common nonglutinous rice |
| 652                     | C6652                     | Srau Seng               | -                            | Cambodia | Common nonglutinous rice |
| 653                     | C6653                     | Romang Ker              | -                            | Cambodia | Common nonglutinous rice |
| 655                     | C6655                     | Traneup Khmau           | -                            | Cambodia | Common nonglutinous rice |
| 659                     | C6659                     | Chang Eng Khum          | Prey Nop                     | Cambodia | Common nonglutinous rice |
| 660                     | C6660                     | Chmar Reth              | Pratheath                    | Cambodia | Common nonglutinous rice |
| 661                     | C6661                     | Neang Veng No. 340      | -                            | Cambodia | Common nonglutinous rice |

|      |       |                      |                       |          |                                                                 |
|------|-------|----------------------|-----------------------|----------|-----------------------------------------------------------------|
| 664  | C6664 | Krayar               | Kampot                | Cambodia | Common nonglutinous rice                                        |
| 666  | C6666 | Angkor Kraham        | -                     | Cambodia | Common nonglutinous rice                                        |
| 672  | C6672 | Neang Chan Thugnon   | Beng Phlong           | Cambodia | Common nonglutinous rice                                        |
| 673  | C6673 | Theasla Sral         | Takeo                 | Cambodia | Common nonglutinous rice                                        |
| 679  | C6679 | Kong Rua Reth        | -                     | Cambodia | Common nonglutinous rice                                        |
| 683  | C6683 | Khmang Romean        | -                     | Cambodia | Common nonglutinous rice                                        |
| 685  | C6685 | Kraya Choeng No. 355 | -                     | Cambodia | Common nonglutinous rice                                        |
| 687  | C6687 | Kraya Choeng No.105  | -                     | Cambodia | Common nonglutinous rice                                        |
| 690  | C6690 | Vir Veay             | -                     | Cambodia | Common nonglutinous rice                                        |
| 691  | C6691 | Rit Ang Krong        | -                     | Cambodia | Common nonglutinous rice                                        |
| 692  | C6692 | Kong Chek            | -                     | Cambodia | Common nonglutinous rice                                        |
| 693  | C6693 | Kraya                | -                     | Cambodia | Common nonglutinous rice                                        |
| 694  | C6694 | Lek Slek             | -                     | Cambodia | Common nonglutinous rice                                        |
| 695  | C6695 | Angkor Chen          | -                     | Cambodia | Common nonglutinous rice                                        |
| 697  | C6697 | Traneup Bey Kher     | -                     | Cambodia | Common nonglutinous rice                                        |
| 726  | C6726 | Tau Huong 16-1409    | Carles                | Vietnam  | South Vietnam, Early rice of single transplanting               |
| 756  | C6756 | Ravang Thom          | Cantho                | Vietnam  | South Vietnam, Common nonglutinous rice of double transplanting |
| 763  | C6763 | Bong Dua             | Cantho                | Vietnam  | South Vietnam, Early rice of single transplanting               |
| 764  | C6764 | Nang Choc            | Cantho                | Vietnam  | South Vietnam, Season rice of single transplanting              |
| 770  | C6770 | Tam Vuot             | Cantho                | Vietnam  | South Vietnam, -                                                |
| 779  | C6779 | Nep Sap              | Cholon                | Vietnam  | South Vietnam, Glutinous rice                                   |
| 784  | C6784 | Nep Sap              | Cholon                | Vietnam  | South Vietnam, Glutinous rice                                   |
| 786  | C6786 | Nha Sap              | Cholon                | Vietnam  | South Vietnam, Rice raised in the decreasing waterin winter     |
| 791  | C6791 | Doc Phung Lun A      | Giadinh (Ho Chi Minh) | Vietnam  | South Vietnam, Half-season rice of single transplanting         |
| 793  | C6793 | Nep Mo               | Giadinh (Ho Chi Minh) | Vietnam  | South Vietnam, Glutinous rice                                   |
| 800  | C6800 | Bamonh T2            | Bienhoa               | Vietnam  | South Vietnam, Mountain rice                                    |
| 826  | C6826 | Doc Phung            | Bentre                | Vietnam  | South Vietnam, Half-season rice of single transplanting         |
| 827  | C6827 | Doc Phung            | Bentre                | Vietnam  | South Vietnam, Half-season rice of single transplanting         |
| 831  | C6831 | Nang Quot Hang 28    | Bentre                | Vietnam  | South Vietnam, Early rice of single transplanting               |
| 833  | C6833 | Doc Nhey Hang 38     | Bentre                | Vietnam  | South Vietnam, Half-season rice of single transplanting         |
| 835  | C6835 | Doc Nhen Hang 24     | Bentre                | Vietnam  | South Vietnam, Half-season rice of single transplanting         |
| 850  | C6850 | Nang Phet Dec        | Bentre                | Vietnam  | South Vietnam, Late rice of single transplanting                |
| 854  | C6854 | Lua Voi              | Bentre                | Vietnam  | South Vietnam, Early rice of single transplanting               |
| 859  | C6859 | Cadung Chum          | Thu Dau Mot           | Vietnam  | South Vietnam, Season rice of single transplanting              |
| 867  | C6867 | Lua Voi              | Thu Dau Mot           | Vietnam  | South Vietnam, Early rice of single transplanting               |
| 887  | C6887 | Cadung Chum          | Gocong                | Vietnam  | South Vietnam, Season rice of single transplanting              |
| 895  | C6895 | Cadung Ket Som       | Gocong                | Vietnam  | South Vietnam, Season rice of single transplanting              |
| 913  | C6913 | Tau Ngu              | Phan Thiet            | Vietnam  | South Vietnam, Early rice of single transplanting               |
| 924  | C6924 | Mong Chim            | Phan Thiet            | Vietnam  | South Vietnam, Half-season rice of single transplanting         |
| 934  | C6934 | Cadung Hue Ky        | Rachgia               | Vietnam  | South Vietnam, Season rice of single transplanting              |
| 935  | C6935 | Nep Co T1            | Rachgia               | Vietnam  | South Vietnam, Glutinous rice                                   |
| 937  | C6937 | Doc Phung B          | Rachgia               | Vietnam  | South Vietnam, Half-season rice of single transplanting         |
| 938  | C6938 | Doc Phung A          | Rachgia               | Vietnam  | South Vietnam, Half-season rice of single transplanting         |
| 951  | C6951 | Bong Mar             | Tayninh               | Vietnam  | South Vietnam, Early rice of single transplanting               |
| 953  | C6953 | Cadung Chum          | Tayninh               | Vietnam  | South Vietnam, Season rice of single transplanting              |
| 960  | C6960 | Cau Hey              | Tayninh               | Vietnam  | South Vietnam, -                                                |
| 964  | C6964 | Lua Nep              | Vinhlong              | Vietnam  | South Vietnam, Common nonglutinous rice of double transplanting |
| 965  | C6965 | Nang Xoi             | Vinhlong              | Vietnam  | South Vietnam, Season rice of single transplanting              |
| 976  | C6976 | Ba Chuc              | Soctrang              | Vietnam  | South Vietnam, Common nonglutinous rice of double transplanting |
| 987  | C6987 | Bau 157              | Soctrang              | Vietnam  | South Vietnam, -                                                |
| 990  | C6990 | Nang Le Tanup        | Soctrang              | Vietnam  | South Vietnam, Common nonglutinous rice of double transplanting |
| 1000 | C7000 | Nang Keo             | Soctrang              | Vietnam  | South Vietnam, Season rice of single transplanting              |
| 1006 | C7006 | Nang Het Den         | Soctrang              | Vietnam  | South Vietnam, Season rice of single transplanting              |
| 1008 | C7008 | Nang Ech             | Soctrang              | Vietnam  | South Vietnam, Common nonglutinous rice of double transplanting |
| 1012 | C7012 | Chanh 162            | Sontay                | Vietnam  | North Vietnam, Fifth month rice                                 |
| 1013 | C7013 | Bau 122              | Sontay                | Vietnam  | North Vietnam, Fifth month rice                                 |
| 1014 | C7014 | Cau 169 B            | Sontay                | Vietnam  | North Vietnam, Fifth month rice                                 |
| 1016 | C7016 | Ngan                 | Sontay                | Vietnam  | North Vietnam, Fifth month rice                                 |
| 1020 | C7020 | Chanh 205            | Sontay                | Vietnam  | North Vietnam, Fifth month rice                                 |
| 1022 | C7022 | Hop                  | Sontay                | Vietnam  | North Vietnam, Tenth month rice                                 |
| 1024 | C7024 | Tep Trang 176 T2     | Sontay                | Vietnam  | North Vietnam, Fifth month rice                                 |
| 1026 | C7026 | Chiem Chanh 198 A    | Sontay                | Vietnam  | North Vietnam, Fifth month rice                                 |
| 1034 | C7034 | Tam Do 1034          | Haiduong              | Vietnam  | North Vietnam, Tenth month rice                                 |
| 1039 | C7039 | Gie Noi (Sontay)     | Haiduong              | Vietnam  | North Vietnam, Tenth month rice                                 |
| 1042 | C7042 | Tam Lua (Sontay)     | Haiduong              | Vietnam  | North Vietnam, Tenth month rice                                 |
| 1093 | C7093 | Nha Tap (Lua Giang)  | Longxuyen             | Vietnam  | South Vietnam, Rice raised in the decreasing waterin winter     |
| 1103 | C7103 | Hop Va               | Bacviet               | Vietnam  | North Vietnam, Tenth month rice                                 |
| 1105 | C7105 | Tep Saigon 229       | Bacviet               | Vietnam  | North Vietnam, Fifth month rice                                 |
| 1106 | C7106 | Giong Chim 351       | Bacviet               | Vietnam  | North Vietnam, Tenth month rice                                 |
| 1108 | C7108 | Tam Den              | Bacviet               | Vietnam  | North Vietnam, Tenth month rice                                 |
| 1115 | C7115 | Muong Chim           | Bacviet               | Vietnam  | North Vietnam, -                                                |
| 1117 | C7117 | Giau Trang ND        | Bacviet               | Vietnam  | North Vietnam, Tenth month rice                                 |
| 1126 | C7126 | Gie Den              | Bacviet               | Vietnam  | North Vietnam, Tenth month rice                                 |
| 1141 | C7141 | Nang Ket             | Tanan                 | Vietnam  | South Vietnam, Season rice of single transplanting              |
| 1142 | C7142 | Doc Sau              | Tanan                 | Vietnam  | South Vietnam, Half-season rice of single transplanting         |
| 1149 | C7149 | Lua Uoi              | Tanan                 | Vietnam  | South Vietnam, Floating rice                                    |
| 1152 | C7152 | Nang Quot            | Tanan                 | Vietnam  | South Vietnam, Early rice of single transplanting               |
| 1179 | C7179 | Nep Trung Vit        | Camau                 | Vietnam  | South Vietnam, Glutinous rice                                   |
| 1194 | C7194 | Chantas Phloulk      | -                     | Cambodia | Common nonglutinous rice                                        |

<sup>a</sup> Accession number by Prof. Hamada

<sup>b</sup> Accession number in National Institute of Genetics.

**Table S2.** Grain traits measured with 162 local rice varieties in Indo–China countries. SL: seed length, SW: seed width, ST: seed thickness, BL: brown rice length, BW: brown rice width, BT: brown rice thickness, 100W: 100-seed weight.

| Hamada no. <sup>a</sup> | NIG acc. no. <sup>b</sup> | SL (mm) | SW (mm) | ST (mm) | BL (mm) | BW (mm) | BT (mm) | 100W (g) |
|-------------------------|---------------------------|---------|---------|---------|---------|---------|---------|----------|
| 20                      | C6020                     | 8.39    | 2.75    | 1.87    | 6.09    | 2.34    | 1.68    | 2.22     |
| 25                      | C6025                     | 8.75    | 2.30    | 1.81    | 6.35    | 1.98    | 1.66    | 2.11     |
| 51                      | C6051                     | 10.49   | 2.42    | 1.99    | 7.58    | 2.07    | 1.79    | 2.73     |
| 76                      | C6076                     | 9.55    | 3.25    | 2.21    | 6.65    | 2.66    | 1.92    | 3.23     |
| 90                      | C6090                     | 10.15   | 2.51    | 1.98    | 7.47    | 2.13    | 1.78    | 2.78     |
| 105                     | C6105                     | 10.21   | 3.43    | 2.29    | 7.46    | 2.90    | 2.04    | 4.18     |
| 109                     | C6109                     | 8.44    | 3.28    | 2.13    | 5.71    | 2.62    | 1.79    | 2.45     |
| 113                     | C6113                     | 10.15   | 2.45    | 2.00    | 7.49    | 2.06    | 1.80    | 3.02     |
| 116                     | C6116                     | 8.81    | 2.76    | 1.96    | 6.09    | 2.31    | 1.75    | 2.33     |
| 128                     | C6128                     | 9.76    | 2.62    | 2.02    | 6.75    | 2.22    | 1.78    | 2.63     |
| 143                     | C6143                     | 9.75    | 2.60    | 1.97    | 6.76    | 2.06    | 1.72    | 2.68     |
| 145                     | C6145                     | 10.28   | 3.10    | 2.10    | 7.41    | 2.48    | 1.88    | 3.12     |
| 167                     | C6167                     | 8.77    | 2.84    | 2.12    | 6.23    | 2.42    | 1.92    | 2.60     |
| 170                     | C6170                     | 8.77    | 2.85    | 2.03    | 6.01    | 2.27    | 1.81    | 2.33     |
| 179                     | C6179                     | 10.54   | 3.22    | 2.09    | 7.37    | 2.62    | 1.89    | 3.29     |
| 186                     | C6186                     | 9.76    | 3.12    | 2.08    | 6.93    | 2.54    | 1.84    | 2.95     |
| 190                     | C6190                     | 10.53   | 2.46    | 2.03    | 7.74    | 2.12    | 1.82    | 2.94     |
| 199                     | C6199                     | 10.87   | 3.46    | 2.25    | 7.40    | 2.81    | 1.99    | 3.90     |
| 201                     | C6201                     | 8.81    | 3.36    | 2.30    | 6.14    | 2.80    | 1.97    | 3.26     |
| 208                     | C6208                     | 8.91    | 2.70    | 1.94    | 6.39    | 2.29    | 1.73    | 2.37     |
| 209                     | C6209                     | 8.78    | 3.45    | 2.25    | 6.10    | 2.85    | 2.00    | 2.68     |
| 211                     | C6211                     | 10.08   | 3.19    | 2.18    | 6.75    | 2.56    | 1.92    | 3.04     |
| 216                     | C6216                     | 10.15   | 3.16    | 2.27    | 7.17    | 2.64    | 2.00    | 3.51     |
| 217                     | C6217                     | 10.60   | 2.97    | 2.14    | 7.22    | 2.48    | 1.91    | 3.60     |
| 220                     | C6220                     | 10.63   | 2.56    | 2.11    | 7.53    | 2.12    | 1.86    | 2.93     |
| 222                     | C6222                     | 9.56    | 2.56    | 1.92    | 7.12    | 2.14    | 1.72    | 2.49     |
| 234                     | C6234                     | 9.93    | 2.71    | 2.11    | 7.15    | 2.32    | 1.87    | 3.02     |
| 237                     | C6237                     | 9.39    | 2.57    | 1.96    | 6.74    | 2.20    | 1.74    | 2.52     |
| 238                     | C6238                     | 9.69    | 2.51    | 2.06    | 7.23    | 2.18    | 1.88    | 2.83     |
| 239                     | C6239                     | 9.66    | 2.73    | 2.05    | 7.27    | 2.33    | 1.87    | 2.95     |
| 250                     | C6250                     | 9.09    | 2.59    | 1.96    | 6.65    | 2.15    | 1.67    | 2.38     |
| 252                     | C6252                     | 9.55    | 2.49    | 1.96    | 6.88    | 2.15    | 1.76    | 2.68     |
| 254                     | C6254                     | 10.12   | 2.74    | 2.14    | 7.57    | 2.32    | 1.91    | 3.11     |
| 255                     | C6255                     | 10.48   | 2.78    | 2.21    | 7.66    | 2.35    | 1.93    | 3.26     |
| 256                     | C6256                     | 9.51    | 2.33    | 1.93    | 6.83    | 2.04    | 1.74    | 2.28     |
| 260                     | C6260                     | 10.88   | 2.32    | 1.87    | 7.87    | 1.93    | 1.68    | 2.49     |
| 265                     | C6265                     | 10.93   | 2.20    | 1.94    | 7.66    | 1.93    | 1.74    | 2.51     |
| 318                     | C6318                     | 9.57    | 2.73    | 1.99    | 6.64    | 2.22    | 1.74    | 3.10     |
| 393                     | C6393                     | 8.28    | 2.49    | 1.91    | 5.87    | 2.18    | 1.72    | 1.98     |
| 429                     | C6429                     | 9.46    | 2.54    | 1.98    | 6.95    | 2.18    | 1.74    | 2.65     |
| 431                     | C6431                     | 9.32    | 2.67    | 2.06    | 6.90    | 2.30    | 1.83    | 2.75     |
| 433                     | C6433                     | 10.04   | 2.53    | 1.97    | 7.34    | 2.13    | 1.74    | 2.55     |
| 443                     | C6443                     | 10.00   | 2.40    | 2.03    | 6.95    | 2.03    | 1.81    | 2.56     |
| 444                     | C6444                     | 10.60   | 2.67    | 2.00    | 7.81    | 2.21    | 1.79    | 2.78     |
| 446                     | C6446                     | 10.16   | 2.69    | 2.13    | 7.58    | 2.27    | 1.89    | 3.15     |
| 458                     | C6458                     | 10.16   | 2.59    | 2.07    | 7.42    | 2.18    | 1.84    | 3.06     |
| 463                     | C6463                     | 10.42   | 2.52    | 1.99    | 7.67    | 2.14    | 1.79    | 2.84     |
| 467                     | C6467                     | 9.06    | 2.47    | 1.89    | 6.34    | 2.03    | 1.67    | 2.20     |
| 468                     | C6468                     | 10.01   | 3.03    | 2.22    | 7.00    | 2.48    | 1.99    | 3.31     |
| 470                     | C6470                     | 10.90   | 2.63    | 2.16    | 7.86    | 2.24    | 1.92    | 3.37     |
| 473                     | C6473                     | 10.34   | 2.71    | 2.07    | 7.60    | 2.29    | 1.86    | 3.18     |
| 475                     | C6475                     | 10.04   | 2.66    | 2.03    | 7.42    | 2.23    | 1.81    | 2.79     |
| 476                     | C6476                     | 10.20   | 2.47    | 2.01    | 7.36    | 2.23    | 1.76    | 2.74     |
| 477                     | C6477                     | 10.05   | 2.54    | 1.96    | 7.29    | 2.15    | 1.75    | 2.77     |
| 478                     | C6478                     | 9.68    | 2.53    | 1.92    | 7.02    | 2.09    | 1.74    | 2.48     |
| 480                     | C6480                     | 10.05   | 2.49    | 1.99    | 7.20    | 2.09    | 1.79    | 2.71     |
| 481                     | C6481                     | 9.66    | 2.57    | 2.03    | 6.91    | 2.15    | 1.86    | 2.68     |
| 483                     | C6483                     | 10.43   | 2.34    | 2.00    | 7.58    | 1.97    | 1.78    | 2.77     |
| 485                     | C6485                     | 9.78    | 2.33    | 1.99    | 7.28    | 2.06    | 1.79    | 2.58     |
| 489                     | C6489                     | 9.29    | 2.85    | 2.08    | 6.99    | 2.45    | 1.92    | 3.02     |
| 494                     | C6494                     | 10.35   | 2.49    | 2.08    | 7.66    | 2.13    | 1.83    | 2.99     |
| 496                     | C6496                     | 9.42    | 2.60    | 2.06    | 6.87    | 2.21    | 1.79    | 2.70     |
| 501                     | C6501                     | 9.43    | 2.53    | 1.94    | 6.82    | 2.13    | 1.81    | 2.61     |
| 507                     | C6507                     | 8.84    | 2.54    | 1.89    | 6.35    | 2.15    | 1.69    | 2.26     |
| 514                     | C6514                     | 10.50   | 2.34    | 1.99    | 7.84    | 1.98    | 1.77    | 2.73     |
| 518                     | C6518                     | 9.53    | 2.50    | 2.02    | 6.93    | 2.14    | 1.79    | 2.68     |
| 521                     | C6521                     | 10.57   | 2.54    | 2.09    | 7.86    | 2.18    | 1.82    | 3.06     |
| 522                     | C6522                     | 9.84    | 2.46    | 2.02    | 7.14    | 2.17    | 1.82    | 2.66     |
| 527                     | C6527                     | 9.79    | 2.52    | 2.06    | 7.40    | 2.12    | 1.82    | 2.76     |
| 528                     | C6528                     | 10.65   | 2.89    | 2.12    | 7.73    | 2.41    | 1.87    | 3.67     |
| 531                     | C6531                     | 9.84    | 2.28    | 1.99    | 7.10    | 1.96    | 1.80    | 2.50     |
| 535                     | C6535                     | 9.10    | 2.52    | 1.90    | 6.62    | 2.11    | 1.69    | 2.22     |
| 643                     | C6643                     | 10.45   | 2.58    | 2.05    | 7.92    | 2.23    | 1.88    | 3.07     |
| 644                     | C6644                     | 9.57    | 2.66    | 1.96    | 7.01    | 2.27    | 1.72    | 2.64     |
| 645                     | C6645                     | 9.52    | 2.28    | 1.92    | 6.98    | 2.04    | 1.73    | 2.18     |
| 646                     | C6646                     | 7.81    | 2.94    | 1.96    | 5.57    | 2.54    | 1.78    | 2.31     |
| 650                     | C6650                     | 9.89    | 2.49    | 2.07    | 7.33    | 2.15    | 1.86    | 2.79     |
| 652                     | C6652                     | 10.93   | 2.70    | 2.14    | 7.69    | 2.23    | 1.88    | 3.21     |
| 653                     | C6653                     | 8.27    | 2.46    | 1.87    | 5.85    | 2.13    | 1.69    | 1.98     |
| 655                     | C6655                     | 9.49    | 2.63    | 2.05    | 6.38    | 2.13    | 1.84    | 2.55     |

|      |       |       |      |      |      |      |      |      |
|------|-------|-------|------|------|------|------|------|------|
| 659  | C6659 | 9.62  | 2.30 | 1.94 | 6.81 | 2.03 | 1.72 | 2.41 |
| 660  | C6660 | 9.16  | 2.30 | 1.82 | 5.99 | 1.92 | 1.63 | 1.76 |
| 661  | C6661 | 11.52 | 3.30 | 2.26 | 8.27 | 2.79 | 2.02 | 4.40 |
| 664  | C6664 | 11.02 | 2.45 | 2.05 | 7.86 | 2.05 | 1.86 | 2.85 |
| 666  | C6666 | 8.54  | 2.76 | 1.97 | 5.88 | 2.25 | 1.79 | 2.18 |
| 672  | C6672 | 8.37  | 2.65 | 1.89 | 5.94 | 2.27 | 1.69 | 2.18 |
| 673  | C6673 | 8.84  | 2.55 | 1.89 | 6.37 | 2.23 | 1.69 | 2.31 |
| 679  | C6679 | 8.90  | 2.40 | 1.89 | 6.52 | 2.07 | 1.68 | 2.34 |
| 683  | C6683 | 10.09 | 2.90 | 2.19 | 7.46 | 2.48 | 1.96 | 3.23 |
| 685  | C6685 | 10.29 | 3.00 | 2.18 | 7.69 | 2.56 | 1.96 | 3.67 |
| 687  | C6687 | 10.47 | 2.58 | 2.08 | 7.69 | 2.21 | 1.86 | 3.01 |
| 690  | C6690 | 9.24  | 2.54 | 1.95 | 6.71 | 2.18 | 1.71 | 2.45 |
| 691  | C6691 | 9.60  | 2.31 | 1.85 | 7.11 | 1.94 | 1.59 | 2.07 |
| 692  | C6692 | 10.32 | 2.53 | 1.93 | 7.77 | 2.13 | 1.78 | 2.74 |
| 693  | C6693 | 10.70 | 2.61 | 2.04 | 7.60 | 2.22 | 1.78 | 2.89 |
| 694  | C6694 | 9.59  | 2.60 | 1.99 | 6.89 | 2.16 | 1.74 | 2.38 |
| 695  | C6695 | 8.06  | 2.86 | 1.82 | 5.73 | 2.43 | 1.63 | 2.10 |
| 697  | C6697 | 9.92  | 2.21 | 1.78 | 6.86 | 1.77 | 1.59 | 1.95 |
| 726  | C6726 | 8.98  | 2.93 | 2.10 | 6.39 | 2.47 | 1.85 | 2.53 |
| 756  | C6756 | 9.69  | 2.32 | 1.93 | 6.60 | 1.98 | 1.76 | 2.25 |
| 763  | C6763 | 7.49  | 2.88 | 2.07 | 5.42 | 2.43 | 1.86 | 2.28 |
| 764  | C6764 | 8.53  | 2.57 | 1.96 | 6.12 | 2.19 | 1.70 | 2.18 |
| 770  | C6770 | 8.56  | 3.08 | 2.25 | 5.93 | 2.57 | 1.99 | 2.94 |
| 779  | C6779 | 9.83  | 3.02 | 2.09 | 7.02 | 2.41 | 1.89 | 3.06 |
| 784  | C6784 | 8.93  | 2.61 | 2.04 | 6.63 | 2.20 | 1.82 | 2.63 |
| 786  | C6786 | 8.20  | 3.17 | 2.20 | 5.74 | 2.72 | 1.96 | 2.74 |
| 791  | C6791 | 9.87  | 2.75 | 2.11 | 7.09 | 2.38 | 1.88 | 3.16 |
| 793  | C6793 | 9.83  | 2.90 | 2.03 | 6.94 | 2.34 | 1.79 | 2.70 |
| 800  | C6800 | 8.28  | 3.07 | 2.05 | 5.88 | 2.64 | 1.85 | 2.59 |
| 826  | C6826 | 9.75  | 2.47 | 1.99 | 6.75 | 2.11 | 1.78 | 2.52 |
| 827  | C6827 | 9.17  | 2.72 | 2.11 | 6.77 | 2.40 | 1.85 | 2.92 |
| 831  | C6831 | 9.52  | 2.44 | 2.00 | 7.07 | 2.09 | 1.79 | 2.61 |
| 833  | C6833 | 8.91  | 2.75 | 2.04 | 6.35 | 2.37 | 1.85 | 2.75 |
| 835  | C6835 | 8.85  | 2.65 | 2.11 | 6.41 | 2.29 | 1.89 | 2.52 |
| 850  | C6850 | 8.64  | 3.25 | 2.22 | 6.10 | 2.79 | 2.03 | 3.22 |
| 854  | C6854 | 7.24  | 3.20 | 2.20 | 5.17 | 2.78 | 2.01 | 2.57 |
| 859  | C6859 | 7.15  | 2.73 | 1.91 | 5.14 | 2.39 | 1.67 | 1.88 |
| 867  | C6867 | 8.89  | 2.42 | 1.85 | 6.50 | 2.05 | 1.61 | 2.07 |
| 887  | C6887 | 7.44  | 3.20 | 2.12 | 5.41 | 2.74 | 1.88 | 2.57 |
| 895  | C6895 | 7.54  | 3.13 | 2.07 | 5.31 | 2.77 | 1.88 | 2.57 |
| 913  | C6913 | 8.19  | 2.23 | 1.84 | 5.79 | 1.96 | 1.67 | 1.81 |
| 924  | C6924 | 8.62  | 3.23 | 2.23 | 5.87 | 2.64 | 1.97 | 2.81 |
| 934  | C6934 | 7.90  | 2.99 | 2.07 | 5.69 | 2.52 | 1.85 | 2.60 |
| 935  | C6935 | 10.26 | 2.75 | 2.04 | 6.83 | 2.20 | 1.77 | 2.67 |
| 937  | C6937 | 8.28  | 2.90 | 1.98 | 5.98 | 2.49 | 1.82 | 2.39 |
| 938  | C6938 | 7.97  | 2.88 | 1.90 | 5.62 | 2.44 | 1.65 | 2.22 |
| 951  | C6951 | 9.07  | 2.38 | 1.94 | 6.50 | 1.98 | 1.71 | 2.26 |
| 953  | C6953 | 7.87  | 2.99 | 2.11 | 5.57 | 2.55 | 1.92 | 2.77 |
| 960  | C6960 | 8.13  | 3.08 | 2.13 | 5.75 | 2.62 | 1.92 | 2.67 |
| 964  | C6964 | 9.02  | 2.51 | 1.98 | 6.75 | 2.16 | 1.79 | 2.23 |
| 965  | C6965 | 9.25  | 2.64 | 2.13 | 6.67 | 2.25 | 1.89 | 2.64 |
| 976  | C6976 | 8.21  | 2.78 | 2.05 | 5.93 | 2.42 | 1.86 | 2.49 |
| 987  | C6987 | 7.52  | 2.78 | 1.83 | 5.34 | 2.37 | 1.66 | 2.00 |
| 990  | C6990 | 8.99  | 2.73 | 2.04 | 6.42 | 2.32 | 1.83 | 2.73 |
| 1000 | C7000 | 8.45  | 2.56 | 1.86 | 6.08 | 2.19 | 1.63 | 2.06 |
| 1006 | C7006 | 8.14  | 3.19 | 2.21 | 5.68 | 2.77 | 1.99 | 2.89 |
| 1008 | C7008 | 9.11  | 2.74 | 2.04 | 6.51 | 2.36 | 1.81 | 2.95 |
| 1012 | C7012 | 9.20  | 2.40 | 1.90 | 6.71 | 2.12 | 1.66 | 2.32 |
| 1013 | C7013 | 7.70  | 2.62 | 1.95 | 5.46 | 2.36 | 1.72 | 2.07 |
| 1014 | C7014 | 8.13  | 2.45 | 1.82 | 5.83 | 2.12 | 1.60 | 1.90 |
| 1016 | C7016 | 9.05  | 2.43 | 1.86 | 6.69 | 2.06 | 1.64 | 2.16 |
| 1020 | C7020 | 8.19  | 2.49 | 1.79 | 5.93 | 2.12 | 1.58 | 1.85 |
| 1022 | C7022 | 8.44  | 2.66 | 1.91 | 5.89 | 2.26 | 1.72 | 2.08 |
| 1024 | C7024 | 8.13  | 2.34 | 1.80 | 5.89 | 2.05 | 1.62 | 1.83 |
| 1026 | C7026 | 8.81  | 2.40 | 1.89 | 6.48 | 2.02 | 1.69 | 2.25 |
| 1034 | C7034 | 9.14  | 2.55 | 1.83 | 6.24 | 2.22 | 1.61 | 2.06 |
| 1039 | C7039 | 8.31  | 2.34 | 1.75 | 5.76 | 2.02 | 1.57 | 1.73 |
| 1042 | C7042 | 8.37  | 2.49 | 1.77 | 5.70 | 2.16 | 1.54 | 1.71 |
| 1093 | C7093 | 9.13  | 2.35 | 1.90 | 6.74 | 2.02 | 1.72 | 2.21 |
| 1103 | C7103 | 8.06  | 2.49 | 1.85 | 5.73 | 2.17 | 1.67 | 1.90 |
| 1105 | C7105 | 8.47  | 2.63 | 1.87 | 6.05 | 2.19 | 1.67 | 2.06 |
| 1106 | C7106 | 8.21  | 2.44 | 1.88 | 5.92 | 2.10 | 1.68 | 2.03 |
| 1108 | C7108 | 8.28  | 2.60 | 1.83 | 5.93 | 2.25 | 1.62 | 1.97 |
| 1115 | C7115 | 8.13  | 2.63 | 1.82 | 5.79 | 2.27 | 1.63 | 1.89 |
| 1117 | C7117 | 8.67  | 2.60 | 1.97 | 5.88 | 2.30 | 1.77 | 2.29 |
| 1126 | C7126 | 8.34  | 2.98 | 2.06 | 6.03 | 2.49 | 1.86 | 1.89 |
| 1141 | C7141 | 9.87  | 2.63 | 2.03 | 7.20 | 2.21 | 1.80 | 2.83 |
| 1142 | C7142 | 7.86  | 2.53 | 1.86 | 5.60 | 2.11 | 1.67 | 1.95 |
| 1149 | C7149 | 8.14  | 2.94 | 2.10 | 5.78 | 2.56 | 1.94 | 2.57 |
| 1152 | C7152 | 10.36 | 2.29 | 1.92 | 7.47 | 1.95 | 1.70 | 2.38 |
| 1179 | C7179 | 10.00 | 2.95 | 2.12 | 6.91 | 2.39 | 1.96 | 3.18 |
| 1194 | C7194 | 10.68 | 2.47 | 2.08 | 7.56 | 2.07 | 1.89 | 2.67 |

<sup>a</sup> Accession number by Prof. Hamada

<sup>b</sup> Accession number in National Institute of Genetics.

**Table S3.** Information on 19 mutations at 14 grain-size loci. They were previously referred to by Zhang et al. (2020).

| Locus        | Gene ID      | Type  | Region   | Position <sup>a</sup> | Change <sup>b</sup>            | Effect <sup>c</sup>     | Code <sup>d</sup> |
|--------------|--------------|-------|----------|-----------------------|--------------------------------|-------------------------|-------------------|
| <i>GW2</i>   | Os02g0244100 | SNP   | Promoter | -858                  | T to A                         | Grain trait variation   | GW2_SNP           |
|              |              | InDel | Exon     | c.316                 | 1-bp deletion                  | Increasing grain width  | GW2_InDel         |
| <i>GS2</i>   | Os02g0701300 | SNP   | Exon     | c.487 ~ 488           | TC to AA                       | Increasing grain size   | GS2_SNP           |
| <i>qLGY3</i> | Os03g0215400 | InDel | Intoron  | g.7961 ~ 7975         | 2-bp deletion <sup>e</sup>     | Increasing grain length | qLGY3_InDel       |
| <i>GS3</i>   | Os03g0407400 | SNP   | Exon     | c.165                 | C to A                         | Increasing grain length | GS3_SNP1          |
|              |              | SNP   | Intoron  | g.4893 ~ 4894         | TG to CC                       | -                       | GS3_SNP2          |
| <i>GL3.1</i> | Os03g0646900 | SNP   | Exon     | c.1092                | C to A                         | Increasing grain length | GL3.1_SNP         |
| <i>TGW3</i>  | Os03g0841800 | SNP   | Exon     | c.672                 | C to A                         | Increasing grain length | TGW3_SNP          |
| <i>GS5</i>   | Os05g0158500 | InDel | Promoter | -324 ~ -327           | 4-bp deletion                  | Increasing grain size   | GS5_InDel         |
| <i>GW5</i>   | Os05g0187500 | InDel | Promoter | -4810                 | 1212-bp insertion <sup>f</sup> | Increasing grain width  | GW5_InDel         |
| <i>GS6</i>   | Os06g0127800 | InDel | Promoter | -779                  | 12-bp insertion                | Grain size              | GS6_InDel         |
| <i>TGW6</i>  | Os06g0623700 | InDel | Exon     | c.312                 | 1-bp deletion                  | Increasing grain weight | TGW6_InDel        |
|              |              | SNP   | Exon     | c.690                 | G to T                         | -                       | TGW6_SNP          |
| <i>GW6a</i>  | Os06g0650300 | InDel | Promoter | -584 ~ -589           | 6-bp deletion                  | Increasing grain size   | GW6a_InDel1       |
|              |              | InDel | Promoter | -1596 ~ -1620         | 25-bp deletion                 | Increasing grain size   | GW6a_InDel2       |
| <i>GLW7</i>  | Os07g0505200 | InDel | 5'UTR    | -135 ~ -140           | 6-bp deletion                  | Increasing grain size   | GLW7_InDel        |
| <i>GL7</i>   | Os07g0603300 | InDel | 5'UTR    | -104 ~ -114           | 11-bp deletion                 | Grain trait variation   | GL7_InDel1        |
|              |              | InDel | 5'UTR    | -145 ~ -162           | 18-bp deletion                 | Grain trait variation   | GL7_InDel2        |
| <i>GW8</i>   | Os08g0531600 | InDel | 5'UTR    | -23                   | 10-bp insertion                | Increasing grain size   | GW8_InDel         |

<sup>a</sup> Relative base position to the coding start site based on the promoter and UTR sequences (-), CDS (c.), and genomic sequences (g.).

<sup>b</sup> Change from the reference nucleotide sequences (Nipponbare).

<sup>c</sup> Effect (including putative) caused by the mutation.

<sup>d</sup> Mutation code by Zhang et al. (2020).

<sup>e</sup> Balance of 15-bp deletion and 13-bp insertion.

<sup>f</sup> Around 1000 ~ 1200-bp insertion variation was detected in this study.



**Table S4.** Information on the primers to detect 19 functional mutations at 14 grain-size loci.

| Marker <sup>a</sup>     | Forward primer <sup>b</sup> | Reverse primer <sup>b</sup>   | Marker type | Enzyme <sup>c</sup>    | Allele size (bp) <sup>d</sup> |                          |
|-------------------------|-----------------------------|-------------------------------|-------------|------------------------|-------------------------------|--------------------------|
|                         |                             |                               |             |                        | Allele 1                      | Allele 2                 |
| GW2_SNP                 | AAAACCTAACACGTGGATACAAcA    | TTTCGTGTTGGTCAGCATCTTT        | dCAPS       | <i>Nsp I</i> (RCATGY)  | 165                           | 189                      |
| GW2_InDel               | CCTTGGCAGTTGGCAATCTA        | CGATACTCCACAGCATAACTGG        | InDel       | -                      | 99                            | 98                       |
| GS2_SNP                 | GCACCGCGGCCGCAtaCGT         | TGCCATTGGAGGCAGCAGCA          | dCAPS       | <i>Sna BI</i> (TACGTA) | 119                           | 102                      |
| qLGY3_InDel             | TTGGGCCTAATTTTGTCTTTG       | GTCCATGTAGGCCTGGTGAT          | InDel       | -                      | 140                           | 138                      |
| GS3_SNP1                | CGCTGCCTCCAGATGgcG          | AGTTGCTTAAAAAGATAACGGTCAAA    | dCAPS       | <i>Hha I</i> (GCGC)    | 141                           | 158                      |
| GS3_SNP2                | ATGAAAACCTTGTCTGCCACA       | AACGTGTGATTTAATCGTTAACggC     | dCAPS       | <i>Hae III</i> (GGCC)  | 151                           | 175                      |
| GL3.1_SNP               | CGATTCTATCTGGTTCAGTGgTcGA   | TTACCTCCTCGTAGACCTCCA         | dCAPS       | <i>Sal I</i> (GTCGAC)  | 179                           | 202                      |
| TGW3_SNP                | GGAACATTTATGCAGACAAACTG     | CCAAAATCACATATTTTGAGCcG       | dCAPS       | <i>Hpa II</i> (CCGG)   | 147                           | 169                      |
| GS5_InDel               | TCCCATGGAATTACTAGAGAAGC     | TATCCATCGTCCATGGTGAA          | InDel       | -                      | 150                           | 146                      |
| GW5_InDel               | ACTCCGATTGGCATCACTGT        | GGAGGAGGACGGAGTGGT            | InDel       | -                      | 705                           | (1600-2000) <sup>e</sup> |
| GS6_InDel               | CTTCTCCCTTCCCTTCCAC         | TGCCTCACCATTACCACTCC          | InDel       | -                      | 112                           | 124                      |
| TGW6_InDel              | ACACGTACAGCCCCAGCTAC        | TTGCCGGTTTTGTAGTGAAA          | InDel       | -                      | 118                           | 117                      |
| TGW6_SNP                | ATGCGAGTTGGTCCAAAAGG        | GCAACGATCAGATGTGTTCGGTCAGaGCT | dCAPS       | <i>Sac I</i> (GAGCTC)  | 269                           | 296                      |
| GW6a_InDel1             | CTCGTGTTTCTTGTGCATTTG       | TTGACTTATCAGCCGCACTG          | InDel       | -                      | 265                           | 259                      |
| GW6a_InDel2             | CGTGCTCCGATAAAATAGCTAAAA    | CGTTGAGTTTGCATGTTCGT          | InDel       | -                      | 143                           | 118                      |
| GLW7_InDel              | CCCGCCTTTATATCCCTTTC        | CGAGCTCATGAGTGGAAGTG          | InDel       | -                      | 111                           | 105                      |
| GL7_InDel1 <sup>f</sup> | TCTCCCTCTCCTCACGACAC        | AAGGAGCAAGCAGAGGTACG          | InDel       | -                      | 134                           | 123                      |
| GL7_InDel2 <sup>f</sup> | TCTCCCTCTCCTCACGACAC        | AAGGAGCAAGCAGAGGTACG          | InDel       | -                      | 134                           | 116                      |
| GW8_InDel               | AGCTTACGCGGGAGCTAA          | CGCTGTTCTCCAGCTCGT            | InDel       | -                      | 115                           | 125                      |

<sup>a</sup> Marker is named after mutation code in Table S3.<sup>b</sup> Small letters in red indicate modified nucleotide sequences for dCAPS marker.<sup>c</sup> Enzyme used for dCAPS marker. Recognition sequences are shown in parenthesis.<sup>d</sup> Alleles 1 and 2: Nipponbare and non-Nipponbare types, respectively.<sup>e</sup> Allele sizes changed because of the insertion variation.<sup>f</sup> A same primer pair can detect both InDel mutations at *GL7*.

**Table S5.** Genotypes of 19 mutation sites at 14 grain-size loci examined with 162 local rice varieties from Indo–China countries. 1: Allele 1 (Nipponbare type), 2: Allele 2 (non-Nipponbare type), H: Heterozygous allele.

| Hamada no. <sup>a</sup> | NIG acc. no. <sup>b</sup> | GW2 | GW2   | GS2 | qLGY3 | GS3  | GS3  | GL3.1 | TGW3 | GS5   | GW5 <sup>c</sup> | GS6   | TGW6 | TGW6   | GW6a   | GW6a  | GLW7   | GL7    | GL7   | GW8   |
|-------------------------|---------------------------|-----|-------|-----|-------|------|------|-------|------|-------|------------------|-------|------|--------|--------|-------|--------|--------|-------|-------|
|                         |                           | SNP | InDel | SNP | InDel | SNP1 | SNP2 | SNP   | SNP  | InDel | InDel            | InDel | SNP  | InDel1 | InDel2 | InDel | InDel1 | InDel2 | InDel | InDel |
| 20                      | C6020                     | 1   | 1     | 1   | 1     | 1    | 2    | 1     | 1    | 1     | 1                | 2     | 1    | 2      | 2      | 2     | 1      | 2      | 1     | 2     |
| 25                      | C6025                     | 1   | 1     | 1   | 1     | 2    | 1    | 1     | 1    | 1     | 2                | 2     | 1    | 2      | 2      | 1     | 2      | 1      | 2     | 2     |
| 51                      | C6051                     | 1   | 1     | 1   | 1     | 2    | 1    | 1     | 1    | 1     | 2                | 2     | 1    | 2      | 2      | 1     | 2      | 1      | 2     | 2     |
| 76                      | C6076                     | 1   | 1     | 1   | 1     | 2    | 1    | 1     | 1    | 2     | 1                | 2     | 1    | 2      | 2      | 1     | 2      | 1      | 2     | 2     |
| 90                      | C6090                     | 1   | 1     | 1   | 1     | 2    | 1    | 1     | 1    | 1     | 2                | 2     | 1    | 2      | 2      | 1     | 2      | 1      | 2     | 2     |
| 105                     | C6105                     | 1   | 1     | 1   | 1     | 2    | 1    | 1     | 1    | 1     | n.a.             | 2     | 1    | 2      | 2      | 1     | 2      | 1      | 2     | 2     |
| 109                     | C6109                     | 1   | 1     | 1   | 1     | 1    | 2    | 1     | 1    | 2     | 1                | 2     | 1    | 2      | 2      | 1     | 2      | 1      | 2     | 2     |
| 113                     | C6113                     | 2   | 1     | 1   | 1     | 2    | 1    | 1     | 1    | 1     | 2                | 2     | 1    | 2      | 2      | 1     | 2      | 1      | 2     | 2     |
| 116                     | C6116                     | 2   | 1     | 1   | 1     | 1    | 2    | 1     | 1    | 2     | 1                | 2     | 1    | 2      | 2      | 1     | 2      | 1      | 2     | 2     |
| 128                     | C6128                     | 1   | 1     | 1   | 1     | 2    | 1    | 1     | 1    | 1     | 2                | 2     | 1    | 2      | 2      | 1     | 2      | 1      | 2     | 2     |
| 143                     | C6143                     | 1   | 1     | 1   | 1     | 2    | 1    | 1     | 1    | 1     | 2                | 2     | 1    | 2      | 2      | 1     | 2      | 1      | 2     | 2     |
| 145                     | C6145                     | 2   | 1     | 1   | 1     | 2    | 1    | 1     | 1    | 2     | 1                | 2     | 1    | 2      | 2      | 1     | 2      | 1      | 2     | 2     |
| 167                     | C6167                     | 1   | 1     | 1   | 1     | 1    | 2    | 1     | 1    | 2     | 1                | 2     | 1    | 2      | 2      | 1     | 2      | 1      | 2     | 2     |
| 170                     | C6170                     | 1   | 1     | 1   | 1     | 1    | 2    | 1     | 1    | 2     | 1                | 2     | 1    | 2      | 2      | 1     | 2      | 1      | 2     | 2     |
| 179                     | C6179                     | 2   | 1     | 1   | 1     | 2    | 1    | 1     | 1    | 2     | n.a.             | 2     | 1    | 2      | 2      | 1     | 2      | 1      | 2     | 2     |
| 186                     | C6186                     | 1   | 1     | 1   | 1     | 2    | 1    | 1     | 1    | 2     | 1                | 2     | 1    | 2      | 2      | 1     | 2      | 1      | 2     | 2     |
| 190                     | C6190                     | 2   | 1     | 1   | 1     | 2    | 1    | 1     | 1    | 1     | 2                | 2     | 1    | 2      | 2      | 1     | 2      | 1      | 2     | 2     |
| 199                     | C6199                     | 1   | 1     | 1   | 1     | 2    | 1    | 1     | 1    | 2     | 1                | 2     | 1    | 2      | 2      | 1     | 2      | 1      | 2     | 2     |
| 201                     | C6201                     | 1   | 1     | 1   | 1     | 1    | 2    | 1     | 1    | 1     | n.a.             | 2     | 1    | 2      | 2      | 1     | 2      | 1      | 2     | 2     |
| 208                     | C6208                     | 2   | 1     | 1   | 1     | 1    | 2    | 1     | 1    | 2     | 1                | 2     | 1    | 2      | 2      | 2     | 2      | 1      | 2     | 2     |
| 209                     | C6209                     | 1   | 1     | 1   | 1     | 1    | 2    | 1     | 1    | 1     | 1                | 2     | 1    | 2      | 2      | 1     | 2      | 1      | 2     | 2     |
| 211                     | C6211                     | 1   | 1     | 1   | 1     | 2    | 1    | 1     | 1    | 1     | 1                | 2     | 1    | 2      | 2      | 2     | 2      | 1      | 2     | 2     |
| 216                     | C6216                     | 1   | 1     | 1   | 1     | 2    | 2    | 1     | 1    | 1     | 1                | 2     | 1    | 2      | 2      | 1     | 2      | 1      | 2     | 2     |
| 217                     | C6217                     | 2   | 1     | 1   | 1     | 2    | 1    | 1     | 1    | 1     | 1                | 2     | 1    | 2      | 2      | 2     | 2      | 1      | 2     | 2     |
| 220                     | C6220                     | 2   | 1     | 1   | 1     | 2    | 1    | 1     | 1    | 1     | 2                | 2     | 1    | 2      | 2      | 2     | 2      | 1      | 2     | 2     |
| 222                     | C6222                     | 2   | 1     | 1   | 1     | 2    | 1    | 1     | 1    | 1     | 2                | 2     | 1    | 2      | 2      | 2     | 2      | 1      | 2     | 2     |
| 234                     | C6234                     | 2   | 1     | 1   | 1     | 2    | 1    | 1     | 1    | 1     | 1                | 2     | 1    | 2      | 2      | 2     | 2      | 1      | 2     | 2     |
| 237                     | C6237                     | 2   | 1     | 1   | 1     | 1    | 2    | 1     | 1    | 1     | 2                | 2     | 1    | 2      | 2      | 2     | 2      | 1      | 2     | 2     |
| 238                     | C6238                     | 2   | 1     | 1   | 1     | 1    | 1    | 1     | 1    | 1     | n.a.             | 2     | 1    | 2      | 2      | 2     | 2      | 1      | 2     | 2     |
| 239                     | C6239                     | 2   | 1     | 1   | 1     | 2    | 1    | 1     | 1    | 1     | 1                | 2     | 1    | 2      | 2      | 2     | 2      | 1      | 2     | 2     |
| 250                     | C6250                     | 1   | 1     | 1   | 1     | 2    | 1    | 1     | 1    | 1     | 2                | 2     | 1    | 2      | 2      | 2     | 2      | 1      | 2     | 2     |
| 252                     | C6252                     | 2   | 1     | 1   | 1     | 2    | 1    | 1     | 1    | 1     | 2                | 2     | 1    | 2      | 2      | 1     | 2      | 1      | 2     | 2     |
| 254                     | C6254                     | 2   | 1     | 1   | 1     | 2    | 1    | 1     | 1    | 1     | 1                | 2     | 1    | 2      | 2      | 2     | 2      | 1      | 2     | 2     |
| 255                     | C6255                     | 2   | 1     | 1   | 1     | 2    | 1    | 1     | 1    | 1     | 1                | 2     | 1    | 2      | 2      | 2     | 2      | 1      | 2     | 2     |
| 256                     | C6256                     | 2   | 1     | 1   | 1     | 2    | 1    | 1     | 1    | 2     | 2                | 2     | 1    | 2      | 2      | 2     | 2      | 1      | 2     | 2     |
| 260                     | C6260                     | 2   | 1     | 1   | 1     | 2    | 1    | 1     | 1    | 1     | 2                | 2     | 1    | 2      | 2      | 2     | 2      | 1      | 2     | 2     |
| 265                     | C6265                     | 2   | 1     | 1   | 1     | 2    | 1    | 1     | 1    | 1     | 2                | 2     | 1    | 2      | 2      | 2     | 2      | 1      | 2     | 2     |
| 318                     | C6318                     | 1   | 1     | 1   | 1     | 2    | 1    | 1     | 1    | 1     | 2                | 2     | 1    | 2      | 2      | 1     | 2      | 1      | 2     | 2     |
| 393                     | C6393                     | 2   | 1     | 1   | 1     | 2    | 2    | 1     | 1    | 2     | 2                | 2     | 1    | 2      | 2      | 2     | 2      | 1      | 2     | 2     |
| 429                     | C6429                     | 2   | 1     | 1   | 1     | 2    | 1    | 1     | 1    | 1     | 2                | 2     | 1    | 2      | 2      | 2     | 1      | 2      | 1     | 2     |
| 431                     | C6431                     | 2   | 1     | 1   | 1     | 2    | 1    | 1     | 1    | 1     | 2                | 2     | 1    | 2      | 2      | 1     | 2      | 1      | 2     | 2     |
| 433                     | C6433                     | 2   | 1     | 1   | 1     | 2    | 1    | 1     | 1    | 1     | 2                | 2     | 1    | 2      | 2      | 2     | 2      | 1      | 2     | 2     |
| 443                     | C6443                     | 1   | 1     | 1   | 1     | 2    | 1    | 1     | 1    | 1     | 2                | 2     | 1    | 2      | 2      | 2     | 2      | 1      | 2     | 2     |
| 444                     | C6444                     | 2   | 1     | 1   | 1     | 2    | 1    | 1     | 1    | 1     | 2                | 2     | 1    | 2      | 2      | 2     | 2      | 1      | 2     | 2     |
| 446                     | C6446                     | 2   | 1     | 1   | 1     | 2    | 1    | 1     | 1    | 1     | 2                | 2     | 1    | 2      | 2      | 2     | 2      | 1      | 2     | 2     |
| 458                     | C6458                     | 1   | 1     | 1   | 1     | 2    | 1    | 1     | 1    | 1     | 2                | 2     | 1    | 2      | 2      | 2     | 2      | 1      | 2     | 2     |
| 463                     | C6463                     | 1   | 1     | 1   | 1     | 1    | 1    | 1     | 1    | 1     | 2                | 2     | 1    | 2      | 2      | 2     | 2      | 1      | 2     | 2     |
| 467                     | C6467                     | 2   | 1     | 1   | 1     | 1    | 2    | 1     | 1    | 1     | 2                | 2     | 1    | 2      | 2      | 1     | 2      | 1      | 2     | 2     |
| 468                     | C6468                     | 1   | 1     | 1   | 1     | 2    | 2    | 1     | 1    | H     | 1                | 2     | 1    | 2      | 2      | 1     | 2      | 1      | 2     | 2     |
| 470                     | C6470                     | 1   | 1     | 1   | 1     | 2    | 1    | 1     | 1    | 1     | 2                | 2     | 1    | 2      | 2      | 1     | 2      | 1      | 2     | 2     |
| 473                     | C6473                     | 2   | 1     | 1   | 1     | 2    | 1    | 1     | 1    | 1     | 2                | 2     | 1    | 2      | 2      | 2     | 2      | 1      | 2     | 2     |
| 475                     | C6475                     | 2   | 1     | 1   | 1     | 2    | 1    | 1     | 1    | 1     | 2                | 2     | 1    | 2      | 2      | 1     | 2      | 1      | 2     | 2     |
| 476                     | C6476                     | 2   | 1     | 1   | 1     | 2    | 1    | 1     | 1    | 1     | 2                | 2     | 1    | 2      | 2      | 1     | 2      | 1      | 2     | 2     |
| 477                     | C6477                     | 1   | 1     | 1   | 1     | 2    | 1    | 1     | 1    | 1     | 2                | 2     | 1    | 2      | 2      | 2     | 2      | 1      | 2     | 2     |
| 478                     | C6478                     | 2   | 1     | 1   | 1     | 2    | 1    | 1     | 1    | 2     | 2                | 2     | 1    | 2      | 2      | 1     | 2      | 1      | 2     | 2     |
| 480                     | C6480                     | 1   | 1     | 1   | 1     | 2    | 1    | 1     | 1    | 1     | 2                | 2     | 1    | 2      | 2      | 2     | 2      | 1      | 2     | 2     |
| 481                     | C6481                     | 1   | 1     | 1   | 1     | 2    | 1    | 1     | 1    | 1     | 2                | 2     | 1    | 2      | 2      | 2     | 2      | 1      | 2     | 2     |
| 483                     | C6483                     | 2   | 1     | 1   | 1     | 2    | 1    | 1     | 1    | 1     | 2                | 2     | 1    | 2      | 2      | 2     | 2      | 1      | 2     | 2     |
| 485                     | C6485                     | 2   | 1     | 1   | 1     | 2    | 1    | 1     | 1    | 2     | 2                | 2     | 1    | 2      | 2      | 1     | 2      | 1      | 2     | 2     |
| 489                     | C6489                     | 2   | 1     | 1   | 1     | 2    | 1    | 1     | 1    | 2     | 2                | 2     | 1    | 2      | 2      | 2     | 2      | 1      | 2     | 2     |
| 494                     | C6494                     | 2   | 1     | 1   | 1     | 2    | 1    | 1     | 1    | 2     | 2                | 2     | 1    | 2      | 2      | 1     | 2      | 1      | 2     | 2     |
| 496                     | C6496                     | 2   | 1     | 1   | 1     | 2    | 1    | 1     | 1    | 1     | 2                | 2     | 1    | 2      | 2      | 1     | 2      | 1      | 2     | 2     |
| 501                     | C6501                     | 2   | 1     | 1   | 1     | 1    | 1    | 1     | 1    | 1     | 2                | 2     | 1    | 2      | 2      | 2     | 2      | 1      | 2     | 2     |
| 507                     | C6507                     | 1   | 1     | 1   | 1     | 1    | 2    | 1     | 1    | 1     | 2                | 2     | 1    | 2      | 2      | 1     | 2      | 1      | 2     | 2     |
| 514                     | C6514                     | 1   | 1     | 1   | 1     | 2    | 1    | 1     | 1    | 1     | 2                | 2     | 1    | 2      | 2      | 1     | 2      | 1      | 2     | 2     |
| 518                     | C6518                     | 2   | 1     | 1   | 1     | 2    | 1    | 1     | 1    | 1     | 2                | 2     | 1    | 2      | 2      | 1     | 2      | 1      | 2     | 2     |
| 521                     | C6521                     | 2   | 1     | 1   | 1     | 2    | 1    | 1     | 1    | 1     | 2                | 2     | 1    | 2      | 2      | 2     | 2      | 1      | 2     | 2     |
| 522                     | C6522                     | 2   | 1     | 1   | 1     | 2    | 1    | 1     | 1    | 1     | 2                | 2     | 1    | 2      | 2      | 1     | 2      | 1      | 2     | 2     |
| 527                     | C6527                     | 1   | 1     | 1   | 1     | 2    | 1    | 1     | 1    | 1     | 2                | 2     | 1    | 2      | 2      | 2     | 2      | 1      | 2     | 2     |
| 528                     | C6528                     | 2   | 1     | 1   | 1     | 2    | 1    | 1     | 1    | 2     | 2                | 2     | 1    | 2      | 2      | 2     | 2      | 1      | 2     | 2     |
| 531                     | C6531                     | 1   | 1     | 1   | 1     | 2    | 1    | 1     | 1    | 1     | 2                | 2     | 1    | 2      | 2      | 2     | 2      | 1      | 2     | 2     |
| 535                     | C6535                     | 2   | 1     | 1   | 1     | 2    | 1    | 1     | 1    | 1     | 2                | 2     | 1    | 2      | 2      | 2     | 2      | 1      | 2     | 2     |
| 643                     | C6643                     | 2   | 1     | 1   | 1     | 2    | 1    | 1     | 1    | 1     | 2                | 2     | 1    | 2      | 2      | 2     | 2      | 1      | 2     | 2     |
| 644                     | C6644                     | 2   | 1     | 1   | 1     | 2    | 1    | 1     | 1    | 1     | 2                | 2     | 1    | 2      | 2      | 2     | 2      | 1      | 2     | 2     |
| 645                     | C6645                     | 2   | 1     | 1   | 1     | 2    | 1    | 1     | 1    | 2     | 2                | 2     | 1    | 2      | 2      | 2     | 2      | 1      | 2     | 2     |
| 646                     | C6646                     | 2   | 1     | 1   | 1     | 1    | 2    | 1     | 1    | 2     | 1                | 2     | 1    | 2      | 2      | 2     | 2      | 1      | 2     | 2     |
| 650                     | C6650                     | 2   | 1     | 1   | 1     | 2    | 1    | 1     | 1    | H     | 2                | 2     | 1    | 2      | 2      | 1     | 2      | 1      | 2     | 2     |
| 652                     | C6652                     | 1   | 1     | 1   | 1     | 2    | 1    | 1     | 1    | 1     | 2                | 2     | 1    | 2      | 2      | 2     | 2      | 1      | 2     | 2     |
| 653                     | C6653                     | 2   | 1     | 1   | 1     | 1    | 2    | 1     | 1    | 2     | 2                | 2     | 1    | 2      | 2      | 2     | 2      | 1      | 2     | 2     |
| 655                     | C6655                     | 2   | 1     | 1   | 1     | 2    | 1    | 1     | 1    | 1     | 1                | 2     | 1    | 2      | 2      | 2     | 2      | 1      | 2     | 2     |
| 659                     | C6659                     | 2   | 1     | 1   | 1     | 2    | 1    | 1     | 1    | 1     | 2                | 2     | 1    | 2      | 2      | 2     | 2      | 1      | 2     | 2     |
| 660                     | C6660                     | 2   | 1     | 1   | 1     | 1    | 1    | 1     | 1    | 1     | 2                | 2     | 1    | 2      | 2      | 2     | 2      | 1      | 2     | 2     |
| 661                     | C6661                     | 1   | 1     | 1   | 1     | 2    | 1    | 1     | 1    | 1     | n.a.             | 2     | 1    | 2      | 2      | 1     | 2      | 1      | 2     | 2     |
| 664                     | C6664                     | 1   | 1     | 1   | 1     | 2    | 1    | 1     | 1    | 1     | 2                | 2     | 1    | 2      | 2      | 2     | 2      | 1      | 2     | 2     |
| 666                     | C6666                     | 2   | 1     | 1   | 1     | 1    | 1    | 1     | 1    | 1     | 1                | 2     | 1    | 2      | 2      | 2     | 2      | 1      | 2     | 2     |

|      |       |   |   |   |   |   |   |   |   |   |      |   |   |   |   |   |   |   |   |   |
|------|-------|---|---|---|---|---|---|---|---|---|------|---|---|---|---|---|---|---|---|---|
| 672  | C6672 | 2 | 1 | 1 | 1 | 1 | 1 | 1 | 1 | 1 | n.a. | 2 | 1 | 2 | 2 | 2 | 2 | 1 | 2 | 2 |
| 673  | C6673 | 2 | 1 | 1 | 1 | 2 | 1 | 1 | 1 | 1 | 2    | 2 | 1 | 2 | 2 | 2 | 2 | 1 | 2 | 2 |
| 679  | C6679 | 2 | 1 | 1 | 1 | 1 | 2 | 1 | 1 | 1 | 2    | 2 | 1 | 2 | 2 | 1 | 2 | 1 | 2 | 2 |
| 683  | C6683 | 2 | 1 | 1 | 1 | 2 | 1 | 1 | 1 | 1 | n.a. | 2 | 1 | 2 | 2 | 2 | 2 | 1 | 2 | 2 |
| 685  | C6685 | 1 | 1 | 1 | 1 | 2 | 1 | 1 | 1 | 2 | 1    | 2 | 1 | 2 | 2 | 1 | 2 | 1 | 2 | 2 |
| 687  | C6687 | 1 | 1 | 1 | 1 | 2 | 1 | 1 | 1 | 1 | 2    | 2 | 1 | 2 | 2 | 2 | 2 | 1 | 2 | 2 |
| 690  | C6690 | 2 | 1 | 1 | 1 | 2 | 1 | 1 | 1 | 1 | 2    | 2 | 1 | 2 | 2 | 2 | 2 | 1 | 2 | 2 |
| 691  | C6691 | 2 | 1 | 1 | 1 | 1 | 1 | 1 | 1 | 1 | n.a. | 2 | 1 | H | 2 | 2 | 2 | 1 | 2 | 2 |
| 692  | C6692 | 1 | 1 | 1 | 1 | 2 | 1 | 1 | 1 | 1 | 2    | 2 | 1 | 2 | 2 | 1 | 2 | 1 | 2 | 2 |
| 693  | C6693 | 2 | 1 | 1 | 1 | 2 | 1 | 1 | 1 | 1 | 2    | 2 | 1 | 2 | 2 | 1 | 2 | 1 | 2 | 2 |
| 694  | C6694 | 2 | 1 | 1 | 1 | 1 | 2 | 1 | 1 | 1 | 2    | 2 | 1 | 2 | 2 | 1 | 2 | 1 | 2 | 2 |
| 695  | C6695 | 2 | 1 | 1 | 1 | 1 | 2 | 1 | 1 | 2 | 2    | 2 | 1 | 2 | 2 | 2 | 2 | 1 | 2 | 2 |
| 697  | C6697 | 1 | 1 | 1 | 1 | 2 | 1 | 1 | 1 | 1 | 2    | 2 | 1 | 2 | 2 | 2 | 2 | 1 | 2 | 2 |
| 726  | C6726 | 2 | 1 | 1 | 1 | 1 | 2 | 1 | 1 | 2 | 2    | 2 | 1 | 2 | 2 | 2 | 2 | 1 | 2 | 2 |
| 756  | C6756 | 2 | 1 | 1 | 1 | 2 | 1 | 1 | 1 | 1 | 2    | 2 | 1 | 2 | 2 | 2 | 2 | 1 | 2 | 2 |
| 763  | C6763 | 2 | 1 | 1 | 1 | 1 | 2 | 1 | 1 | 1 | 1    | 1 | 2 | 1 | 2 | 2 | 2 | 1 | 2 | 2 |
| 764  | C6764 | 2 | 1 | 1 | 1 | 1 | 2 | 1 | 1 | 1 | 2    | 2 | 1 | 2 | 2 | 2 | 2 | 1 | 2 | 2 |
| 770  | C6770 | 2 | 1 | 1 | 1 | 1 | 2 | 1 | 1 | 1 | 1    | 1 | 2 | 1 | 2 | 2 | 2 | 1 | 2 | 2 |
| 779  | C6779 | 2 | 1 | 1 | 1 | 2 | 1 | 1 | 1 | 1 | 1    | 1 | 2 | 1 | 2 | 2 | 1 | 2 | 1 | 2 |
| 784  | C6784 | 2 | 1 | 1 | 1 | 2 | 1 | 1 | 1 | 1 | 2    | 2 | 1 | 2 | 2 | 2 | 2 | 1 | 2 | 2 |
| 786  | C6786 | 2 | 1 | 1 | 1 | 1 | 2 | 1 | 1 | 1 | 1    | 1 | 2 | 1 | 2 | 2 | 2 | 1 | 2 | 2 |
| 791  | C6791 | 2 | 1 | 1 | 1 | 2 | 1 | 1 | 1 | 1 | 2    | 2 | 1 | 2 | 2 | 2 | 2 | 1 | 2 | 2 |
| 793  | C6793 | 2 | 1 | 1 | 1 | 2 | 1 | 1 | 1 | 1 | n.a. | 2 | 1 | 2 | 2 | 1 | 2 | 1 | 2 | 2 |
| 800  | C6800 | 2 | 1 | 1 | 1 | 1 | 2 | 1 | 1 | 1 | 1    | 1 | 2 | 1 | 2 | 2 | 1 | 2 | 1 | 2 |
| 826  | C6826 | 2 | 1 | 1 | 1 | 1 | 1 | 1 | 1 | H | n.a. | 2 | 1 | 2 | 2 | 2 | 1 | 2 | 1 | 2 |
| 827  | C6827 | 2 | 1 | 1 | 1 | 2 | 1 | 1 | 1 | 1 | 2    | 2 | 1 | 2 | 2 | 2 | 2 | 1 | 2 | 2 |
| 831  | C6831 | 1 | 1 | 1 | 1 | 1 | 1 | 1 | 1 | 1 | 1    | 2 | 1 | 2 | 2 | 1 | 2 | 1 | 2 | 2 |
| 833  | C6833 | 1 | 1 | 1 | 1 | 1 | 2 | 1 | 1 | 1 | 1    | 2 | 2 | 1 | 2 | 2 | 1 | 2 | 1 | 2 |
| 835  | C6835 | 1 | 1 | 1 | 1 | 1 | 2 | 1 | 1 | 1 | 1    | 2 | 2 | 1 | 2 | 2 | 1 | 2 | 1 | 2 |
| 850  | C6850 | 2 | 1 | 1 | 1 | 2 | 1 | 1 | 1 | 2 | n.a. | 2 | 1 | 2 | 2 | 2 | 2 | 1 | 2 | 2 |
| 854  | C6854 | 2 | 1 | 1 | 1 | 1 | 2 | 1 | 1 | 1 | 1    | 1 | 2 | 1 | 2 | 2 | 2 | 1 | 2 | 2 |
| 859  | C6859 | 2 | 1 | 1 | 1 | 1 | 2 | 1 | 1 | 1 | 1    | 1 | 2 | 1 | 2 | 2 | 2 | 1 | 2 | 2 |
| 867  | C6867 | 1 | 1 | 1 | 1 | 1 | 2 | 1 | 1 | 1 | 2    | 2 | 1 | 2 | 2 | 1 | 2 | 1 | 2 | 2 |
| 887  | C6887 | 2 | 1 | 1 | 1 | 2 | 1 | 1 | 1 | 2 | n.a. | 2 | 1 | 2 | 2 | 2 | 2 | 1 | 2 | 2 |
| 895  | C6895 | 2 | 1 | 1 | 1 | 1 | 1 | 1 | 1 | 1 | 1    | 2 | 1 | 2 | 2 | 2 | 2 | 1 | 2 | 2 |
| 913  | C6913 | 1 | 1 | 1 | 1 | 1 | 1 | 1 | 1 | 2 | 2    | 2 | 1 | 2 | 2 | 2 | 2 | 1 | 2 | 2 |
| 924  | C6924 | 2 | 1 | 1 | 1 | 1 | 2 | 1 | 1 | 2 | 1    | 2 | 1 | 2 | 2 | 1 | 2 | 1 | 2 | 2 |
| 934  | C6934 | 2 | 1 | 1 | 1 | 1 | 2 | 1 | 1 | 1 | 1    | 2 | 1 | 2 | 2 | 2 | 2 | 1 | 2 | 2 |
| 935  | C6935 | 2 | 1 | 1 | 1 | 2 | 1 | 1 | 1 | 1 | n.a. | 2 | 1 | 2 | 2 | 2 | 2 | 1 | 2 | 2 |
| 937  | C6937 | 2 | 1 | 1 | 1 | 2 | 2 | 1 | 1 | 1 | n.a. | 2 | 1 | 2 | 2 | 2 | 1 | 2 | 1 | 2 |
| 938  | C6938 | 2 | 1 | 1 | 1 | 1 | 2 | 1 | 1 | 1 | 2    | 2 | 1 | 2 | 2 | 2 | 2 | 1 | 2 | 2 |
| 951  | C6951 | 2 | 1 | 1 | 1 | 1 | 2 | 1 | 1 | 1 | 2    | 2 | 1 | 2 | 2 | 2 | 2 | 1 | 2 | 2 |
| 953  | C6953 | 2 | 1 | 1 | 1 | 1 | 2 | 1 | 1 | 1 | 1    | 1 | 2 | 1 | 2 | 2 | 2 | 1 | 2 | 2 |
| 960  | C6960 | 2 | 1 | 1 | 1 | 2 | 2 | 1 | 1 | 1 | 2    | 2 | 1 | 2 | 2 | 2 | 2 | 1 | 2 | 2 |
| 964  | C6964 | 2 | 1 | 1 | 1 | 1 | 2 | 1 | 1 | 1 | n.a. | 2 | 1 | 2 | 2 | 2 | 2 | 1 | 2 | 2 |
| 965  | C6965 | 2 | 1 | 1 | 1 | 2 | 1 | 1 | 1 | 1 | 2    | 2 | 1 | 2 | 2 | 2 | 2 | 1 | 2 | 2 |
| 976  | C6976 | 2 | 1 | 1 | 1 | 2 | 2 | 1 | 1 | 1 | n.a. | 2 | 1 | 2 | 2 | 2 | 2 | 1 | 2 | 2 |
| 987  | C6987 | 2 | 1 | 1 | 1 | 1 | 2 | 1 | 1 | 2 | 1    | 2 | 1 | 2 | 2 | 2 | 2 | 1 | 2 | 2 |
| 990  | C6990 | 2 | 1 | 1 | 1 | 1 | 2 | 1 | 1 | 1 | 1    | 1 | 2 | 1 | 2 | 2 | 2 | 1 | 2 | 2 |
| 1000 | C7000 | 2 | 1 | 1 | 1 | 1 | 2 | 1 | 1 | 2 | 2    | 2 | 1 | 2 | 2 | 2 | 2 | 1 | 2 | 2 |
| 1006 | C7006 | 2 | 1 | 1 | 1 | 1 | 2 | 1 | 1 | 2 | 1    | 2 | 1 | 2 | 2 | 2 | 2 | 1 | 2 | 2 |
| 1008 | C7008 | 1 | 1 | 1 | 1 | 1 | 2 | 1 | 1 | 1 | n.a. | 2 | 1 | 2 | 2 | 1 | 2 | 1 | 2 | 2 |
| 1012 | C7012 | 2 | 1 | 1 | 1 | 1 | 2 | 1 | 1 | 2 | 2    | 2 | 1 | 2 | 2 | 2 | 2 | 1 | 2 | 2 |
| 1013 | C7013 | 2 | 1 | 1 | 1 | 1 | 2 | 1 | 1 | 2 | 1    | 2 | 1 | 2 | 2 | 2 | 2 | 1 | 2 | 2 |
| 1014 | C7014 | 2 | 1 | 1 | 1 | 1 | 2 | 1 | 1 | 2 | 2    | 2 | 1 | 2 | 2 | 2 | 2 | 1 | 2 | 2 |
| 1016 | C7016 | 2 | 1 | 1 | 1 | 1 | 2 | 1 | 1 | 2 | 2    | 2 | 1 | 2 | 2 | 2 | 2 | 1 | 2 | 2 |
| 1020 | C7020 | 2 | 1 | 1 | 1 | 1 | 2 | 1 | 1 | 2 | 2    | 2 | 1 | 2 | 2 | 2 | 2 | 1 | 2 | 2 |
| 1022 | C7022 | 2 | 1 | 1 | 1 | 1 | 2 | 1 | 1 | 1 | 2    | 2 | 1 | 2 | 2 | 2 | 2 | 1 | 2 | 2 |
| 1024 | C7024 | 2 | 1 | 1 | 1 | 1 | 2 | 1 | 1 | 2 | 2    | 2 | 1 | 2 | 2 | 2 | 2 | 1 | 2 | 2 |
| 1026 | C7026 | 2 | 1 | 1 | 1 | 1 | 2 | 1 | 1 | 2 | 2    | 2 | 1 | 2 | 2 | 2 | 2 | 1 | 2 | 2 |
| 1034 | C7034 | 2 | 1 | 1 | 1 | 1 | 2 | 1 | 1 | H | 2    | 2 | 1 | 2 | 2 | 2 | 2 | 2 | 1 | 2 |
| 1039 | C7039 | 2 | 1 | 1 | 1 | 1 | 2 | 1 | 1 | 2 | 2    | 2 | 1 | 1 | 2 | 2 | 2 | 1 | 2 | 2 |
| 1042 | C7042 | 2 | 1 | 1 | 1 | 1 | 2 | 1 | 1 | 2 | 2    | 2 | 1 | 2 | 2 | 2 | 2 | 2 | 1 | 2 |
| 1093 | C7093 | 2 | 1 | 1 | 1 | 2 | 2 | 1 | 1 | 1 | 2    | 2 | 1 | 2 | 2 | 2 | 2 | 1 | 2 | 2 |
| 1103 | C7103 | 2 | 1 | 1 | 1 | 1 | 2 | 1 | 1 | 1 | 2    | 2 | 1 | 2 | 2 | 2 | 2 | 1 | 2 | 2 |
| 1105 | C7105 | 2 | 1 | 1 | 1 | 1 | 2 | 1 | 1 | 2 | 2    | 2 | 1 | 2 | 2 | 2 | 2 | 1 | 2 | 2 |
| 1106 | C7106 | 2 | 1 | 1 | 1 | 1 | 2 | 1 | 1 | 2 | 2    | 2 | 1 | 2 | 2 | 2 | 2 | 1 | 2 | 2 |
| 1108 | C7108 | 2 | 1 | 1 | 1 | 1 | 2 | 1 | 1 | 2 | 2    | 2 | 1 | 2 | 2 | 2 | 2 | 1 | 2 | 2 |
| 1115 | C7115 | 2 | 1 | 1 | 1 | 1 | 2 | 1 | 1 | 2 | 2    | 2 | 1 | 2 | 2 | 2 | 2 | 2 | 1 | 2 |
| 1117 | C7117 | 1 | 1 | 1 | 1 | 1 | 2 | 1 | 1 | 1 | 2    | 2 | 1 | 2 | 2 | 2 | 2 | 1 | 2 | 2 |
| 1126 | C7126 | 2 | 1 | 1 | 1 | 1 | 2 | 1 | 1 | 2 | 1    | 2 | 1 | 2 | 2 | 2 | 2 | 1 | 2 | 2 |
| 1141 | C7141 | 2 | 1 | 1 | 1 | 2 | 1 | 1 | 1 | 1 | 2    | 2 | 1 | 2 | 2 | 2 | 2 | 1 | 2 | 2 |
| 1142 | C7142 | 2 | 1 | 1 | 1 | 1 | 2 | 1 | 1 | 1 | 2    | 2 | 1 | 2 | 2 | 2 | 2 | 1 | 2 | 2 |
| 1149 | C7149 | 2 | 1 | 1 | 1 | 1 | 2 | 1 | 1 | 2 | 1    | 2 | 1 | 2 | 2 | 2 | 2 | 1 | 2 | 2 |
| 1152 | C7152 | 1 | 1 | 1 | 1 | 2 | 2 | 1 | 1 | 1 | 2    | 2 | 1 | 2 | 2 | 2 | 2 | 1 | 2 | 2 |
| 1179 | C7179 | 2 | 1 | 1 | 1 | 2 | 2 | 1 | 1 | 1 | 1    | 2 | 1 | 2 | 2 | 2 | 2 | 1 | 2 | 2 |
| 1194 | C7194 | 2 | 1 | 1 | 1 | 2 | 1 | 1 | 1 | 1 | 2    | 2 | 1 | 2 | 2 | 2 | 2 | 1 | 2 | 2 |

<sup>a</sup> Accession number by Prof. Hamada

<sup>b</sup> Accession number in National Institute of Genetics.

<sup>c</sup> n.a.: Not available because of no amplification.

**Table S6.** Three grain traits (hull color, pericarp color, and glutinosity) observed in the 162 local rice varieties. Major natural mutations at *Bh4*, *Rc*, and *Waxy* were also surveyed.

| Hamada no. <sup>a</sup> | NIG acc. no. <sup>b</sup> | Hull color   | Pericarp color | Glutinosity   | <i>Bh4</i> <sup>c</sup> | <i>Rc</i> <sup>c</sup> | <i>Waxy</i> <sup>c</sup> |
|-------------------------|---------------------------|--------------|----------------|---------------|-------------------------|------------------------|--------------------------|
| 20                      | C6020                     | Straw        | White          | Non-glutinous | NF                      | NF                     | F                        |
| 25                      | C6025                     | Straw        | White          | Non-glutinous | NF                      | NF                     | F                        |
| 51                      | C6051                     | Straw        | White          | Non-glutinous | NF                      | NF                     | F                        |
| 76                      | C6076                     | Straw        | White          | Glutinous     | NF                      | NF                     | NF                       |
| 90                      | C6090                     | Straw        | White          | Non-glutinous | NF                      | NF                     | F                        |
| 105                     | C6105                     | Straw        | White          | Non-glutinous | NF                      | NF                     | F                        |
| 109                     | C6109                     | Intermediate | Purple         | Glutinous     | NF                      | NF                     | NF                       |
| 113                     | C6113                     | Straw        | White          | Non-glutinous | NF                      | NF                     | F                        |
| 116                     | C6116                     | Straw        | White          | Glutinous     | NF                      | NF                     | NF                       |
| 128                     | C6128                     | Straw        | White          | Glutinous     | NF                      | NF                     | NF                       |
| 143                     | C6143                     | Intermediate | White          | Glutinous     | NF                      | NF                     | NF                       |
| 145                     | C6145                     | Straw        | White          | Glutinous     | NF                      | NF                     | NF                       |
| 167                     | C6167                     | Straw        | White          | Non-glutinous | NF                      | NF                     | F                        |
| 170                     | C6170                     | Intermediate | Purple         | Glutinous     | NF                      | NF                     | NF                       |
| 179                     | C6179                     | Straw        | White          | Glutinous     | NF                      | NF                     | NF                       |
| 186                     | C6186                     | Intermediate | White          | Glutinous     | NF                      | NF                     | NF                       |
| 190                     | C6190                     | Straw        | White          | Non-glutinous | NF                      | NF                     | F                        |
| 199                     | C6199                     | Intermediate | White          | Glutinous     | NF                      | NF                     | NF                       |
| 201                     | C6201                     | Straw        | White          | Glutinous     | NF                      | NF                     | NF                       |
| 208                     | C6208                     | Straw        | White          | Non-glutinous | NF                      | NF                     | F                        |
| 209                     | C6209                     | Straw        | White          | Glutinous     | NF                      | NF                     | NF                       |
| 211                     | C6211                     | Intermediate | Red            | Glutinous     | NF                      | F                      | NF                       |
| 216                     | C6216                     | Intermediate | White          | Glutinous     | NF                      | NF                     | NF                       |
| 217                     | C6217                     | Straw        | White          | Glutinous     | NF                      | NF                     | NF                       |
| 220                     | C6220                     | Straw        | White          | Non-glutinous | NF                      | NF                     | F                        |
| 222                     | C6222                     | Straw        | White          | Non-glutinous | NF                      | NF                     | F                        |
| 234                     | C6234                     | Straw        | White          | Non-glutinous | NF                      | NF                     | F                        |
| 237                     | C6237                     | Straw        | White          | Non-glutinous | NF                      | NF                     | F                        |
| 238                     | C6238                     | Intermediate | White          | Non-glutinous | NF                      | NF                     | F                        |
| 239                     | C6239                     | Intermediate | White          | Non-glutinous | NF                      | NF                     | F                        |
| 250                     | C6250                     | Straw        | White          | Non-glutinous | NF                      | NF                     | F                        |
| 252                     | C6252                     | Straw        | White          | Non-glutinous | NF                      | NF                     | F                        |
| 254                     | C6254                     | Intermediate | White          | Non-glutinous | NF                      | NF                     | F                        |
| 255                     | C6255                     | Intermediate | White          | Non-glutinous | NF                      | NF                     | F                        |
| 256                     | C6256                     | Intermediate | White          | Non-glutinous | NF                      | NF                     | F                        |
| 260                     | C6260                     | Straw        | White          | Non-glutinous | NF                      | NF                     | F                        |
| 265                     | C6265                     | Straw        | White          | Non-glutinous | NF                      | NF                     | F                        |
| 318                     | C6318                     | Intermediate | White          | Glutinous     | NF                      | NF                     | NF                       |
| 393                     | C6393                     | Straw        | White          | Non-glutinous | NF                      | NF                     | F                        |
| 429                     | C6429                     | Straw        | White          | Non-glutinous | NF                      | NF                     | F                        |
| 431                     | C6431                     | Straw        | White          | Non-glutinous | NF                      | NF                     | F                        |
| 433                     | C6433                     | Straw        | White          | Non-glutinous | NF                      | NF                     | F                        |
| 443                     | C6443                     | Straw        | White          | Non-glutinous | NF                      | NF                     | F                        |
| 444                     | C6444                     | Straw        | White          | Non-glutinous | NF                      | NF                     | F                        |
| 446                     | C6446                     | Straw        | White          | Non-glutinous | NF                      | NF                     | F                        |
| 458                     | C6458                     | Straw        | White          | Non-glutinous | NF                      | NF                     | F                        |
| 463                     | C6463                     | Straw        | White          | Non-glutinous | NF                      | NF                     | F                        |
| 467                     | C6467                     | Straw        | White          | Non-glutinous | NF                      | NF                     | F                        |
| 468                     | C6468                     | Intermediate | White          | Glutinous     | NF                      | NF                     | NF                       |
| 470                     | C6470                     | Straw        | White          | Non-glutinous | NF                      | NF                     | F                        |
| 473                     | C6473                     | Straw        | White          | Non-glutinous | NF                      | NF                     | F                        |
| 475                     | C6475                     | Straw        | White          | Non-glutinous | NF                      | NF                     | F                        |
| 476                     | C6476                     | Straw        | White          | Non-glutinous | NF                      | NF                     | F                        |
| 477                     | C6477                     | Straw        | White          | Non-glutinous | NF                      | NF                     | F                        |
| 478                     | C6478                     | Intermediate | White          | Non-glutinous | NF                      | NF                     | F                        |
| 480                     | C6480                     | Straw        | White          | Non-glutinous | NF                      | NF                     | F                        |
| 481                     | C6481                     | Straw        | White          | Non-glutinous | NF                      | NF                     | F                        |
| 483                     | C6483                     | Straw        | White          | Non-glutinous | NF                      | NF                     | F                        |
| 485                     | C6485                     | Straw        | White          | Non-glutinous | NF                      | NF                     | F                        |
| 489                     | C6489                     | Straw        | White          | Non-glutinous | NF                      | NF                     | F                        |
| 494                     | C6494                     | Intermediate | White          | Non-glutinous | NF                      | NF                     | F                        |
| 496                     | C6496                     | Straw        | White          | Non-glutinous | NF                      | NF                     | F                        |
| 501                     | C6501                     | Straw        | White          | Non-glutinous | NF                      | NF                     | F                        |
| 507                     | C6507                     | Straw        | White          | Non-glutinous | NF                      | NF                     | F                        |
| 514                     | C6514                     | Straw        | White          | Non-glutinous | NF                      | NF                     | F                        |
| 518                     | C6518                     | Straw        | White          | Non-glutinous | NF                      | NF                     | F                        |
| 521                     | C6521                     | Straw        | White          | Non-glutinous | NF                      | NF                     | F                        |
| 522                     | C6522                     | Straw        | White          | Non-glutinous | NF                      | NF                     | F                        |
| 527                     | C6527                     | Straw        | White          | Non-glutinous | NF                      | NF                     | F                        |
| 528                     | C6528                     | Straw        | White          | Non-glutinous | NF                      | NF                     | F                        |
| 531                     | C6531                     | Straw        | White          | Non-glutinous | NF                      | NF                     | F                        |
| 535                     | C6535                     | Straw        | White          | Non-glutinous | NF                      | NF                     | F                        |
| 643                     | C6643                     | Straw        | White          | Non-glutinous | NF                      | NF                     | F                        |
| 644                     | C6644                     | Straw        | White          | Non-glutinous | NF                      | NF                     | F                        |
| 645                     | C6645                     | Straw        | White          | Non-glutinous | NF                      | NF                     | F                        |
| 646                     | C6646                     | Straw        | White          | Non-glutinous | NF                      | NF                     | F                        |
| 650                     | C6650                     | Straw        | White          | Non-glutinous | NF                      | NF                     | F                        |
| 652                     | C6652                     | Intermediate | White          | Non-glutinous | NF                      | NF                     | F                        |
| 653                     | C6653                     | Intermediate | White          | Non-glutinous | NF                      | NF                     | F                        |
| 655                     | C6655                     | Intermediate | Purple         | Glutinous     | NF                      | NF                     | NF                       |

|      |       |              |       |               |    |    |    |
|------|-------|--------------|-------|---------------|----|----|----|
| 659  | C6659 | Straw        | White | Non-glutinous | NF | NF | F  |
| 660  | C6660 | Straw        | White | Non-glutinous | NF | NF | F  |
| 661  | C6661 | Straw        | White | Non-glutinous | NF | NF | F  |
| 664  | C6664 | Straw        | White | Non-glutinous | NF | NF | F  |
| 666  | C6666 | Straw        | White | Glutinous     | NF | NF | NF |
| 672  | C6672 | Straw        | White | Non-glutinous | NF | NF | F  |
| 673  | C6673 | Straw        | White | Non-glutinous | NF | NF | F  |
| 679  | C6679 | Intermediate | White | Non-glutinous | NF | NF | F  |
| 683  | C6683 | Intermediate | White | Non-glutinous | NF | NF | F  |
| 685  | C6685 | Straw        | White | Non-glutinous | NF | NF | F  |
| 687  | C6687 | Straw        | White | Non-glutinous | NF | NF | F  |
| 690  | C6690 | Straw        | White | Non-glutinous | NF | NF | F  |
| 691  | C6691 | Intermediate | White | Non-glutinous | NF | NF | F  |
| 692  | C6692 | Straw        | White | Non-glutinous | NF | NF | F  |
| 693  | C6693 | Straw        | White | Non-glutinous | NF | NF | F  |
| 694  | C6694 | Straw        | White | Non-glutinous | NF | NF | F  |
| 695  | C6695 | Intermediate | Red   | Non-glutinous | NF | F  | F  |
| 697  | C6697 | Intermediate | White | Glutinous     | NF | NF | NF |
| 726  | C6726 | Straw        | White | Non-glutinous | NF | NF | F  |
| 756  | C6756 | Intermediate | White | Non-glutinous | NF | NF | F  |
| 763  | C6763 | Straw        | White | Non-glutinous | NF | NF | F  |
| 764  | C6764 | Straw        | White | Non-glutinous | NF | NF | F  |
| 770  | C6770 | Straw        | White | Non-glutinous | NF | NF | F  |
| 779  | C6779 | Straw        | White | Glutinous     | NF | NF | NF |
| 784  | C6784 | Straw        | White | Non-glutinous | NF | NF | F  |
| 786  | C6786 | Straw        | White | Non-glutinous | NF | NF | F  |
| 791  | C6791 | Intermediate | White | Non-glutinous | NF | NF | F  |
| 793  | C6793 | Straw        | White | Glutinous     | NF | NF | NF |
| 800  | C6800 | Straw        | White | Non-glutinous | NF | NF | F  |
| 826  | C6826 | Intermediate | White | Non-glutinous | NF | NF | F  |
| 827  | C6827 | Intermediate | White | Non-glutinous | NF | NF | F  |
| 831  | C6831 | Straw        | White | Non-glutinous | NF | NF | F  |
| 833  | C6833 | Straw        | White | Non-glutinous | NF | NF | F  |
| 835  | C6835 | Straw        | White | Non-glutinous | NF | NF | F  |
| 850  | C6850 | Intermediate | White | Non-glutinous | NF | NF | F  |
| 854  | C6854 | Straw        | White | Non-glutinous | NF | NF | F  |
| 859  | C6859 | Straw        | White | Non-glutinous | NF | NF | F  |
| 867  | C6867 | Straw        | White | Non-glutinous | NF | NF | F  |
| 887  | C6887 | Straw        | White | Non-glutinous | NF | NF | F  |
| 895  | C6895 | Straw        | White | Non-glutinous | NF | NF | F  |
| 913  | C6913 | Straw        | White | Non-glutinous | NF | NF | F  |
| 924  | C6924 | Intermediate | White | Glutinous     | NF | NF | NF |
| 934  | C6934 | Straw        | White | Non-glutinous | NF | NF | F  |
| 935  | C6935 | Intermediate | White | Glutinous     | NF | NF | NF |
| 937  | C6937 | Intermediate | White | Non-glutinous | NF | NF | F  |
| 938  | C6938 | Intermediate | White | Non-glutinous | NF | NF | F  |
| 951  | C6951 | Straw        | White | Non-glutinous | NF | NF | F  |
| 953  | C6953 | Straw        | White | Non-glutinous | NF | NF | F  |
| 960  | C6960 | Straw        | White | Non-glutinous | NF | NF | F  |
| 964  | C6964 | Straw        | White | Non-glutinous | NF | NF | F  |
| 965  | C6965 | Straw        | White | Non-glutinous | NF | NF | F  |
| 976  | C6976 | Straw        | White | Non-glutinous | NF | NF | F  |
| 987  | C6987 | Straw        | White | Non-glutinous | NF | NF | F  |
| 990  | C6990 | Straw        | White | Non-glutinous | NF | NF | F  |
| 1000 | C7000 | Intermediate | White | Non-glutinous | NF | NF | F  |
| 1006 | C7006 | Intermediate | White | Non-glutinous | NF | NF | F  |
| 1008 | C7008 | Straw        | White | Non-glutinous | NF | NF | F  |
| 1012 | C7012 | Straw        | White | Non-glutinous | NF | NF | F  |
| 1013 | C7013 | Straw        | White | Non-glutinous | NF | NF | F  |
| 1014 | C7014 | Straw        | White | Non-glutinous | NF | NF | F  |
| 1016 | C7016 | Straw        | White | Non-glutinous | NF | NF | F  |
| 1020 | C7020 | Straw        | White | Non-glutinous | NF | NF | F  |
| 1022 | C7022 | Straw        | White | Non-glutinous | NF | NF | F  |
| 1024 | C7024 | Straw        | White | Non-glutinous | NF | NF | F  |
| 1026 | C7026 | Straw        | White | Non-glutinous | NF | NF | F  |
| 1034 | C7034 | Intermediate | White | Non-glutinous | NF | NF | F  |
| 1039 | C7039 | Intermediate | White | Non-glutinous | NF | NF | F  |
| 1042 | C7042 | Intermediate | White | Non-glutinous | NF | NF | F  |
| 1093 | C7093 | Straw        | White | Non-glutinous | NF | NF | F  |
| 1103 | C7103 | Straw        | White | Non-glutinous | NF | NF | F  |
| 1105 | C7105 | Straw        | White | Non-glutinous | NF | NF | F  |
| 1106 | C7106 | Straw        | White | Non-glutinous | NF | NF | F  |
| 1108 | C7108 | Intermediate | White | Non-glutinous | NF | NF | F  |
| 1115 | C7115 | Straw        | White | Non-glutinous | NF | NF | F  |
| 1117 | C7117 | Intermediate | White | Non-glutinous | NF | NF | F  |
| 1126 | C7126 | Intermediate | Red   | Non-glutinous | NF | F  | F  |
| 1141 | C7141 | Straw        | White | Non-glutinous | NF | NF | F  |
| 1142 | C7142 | Intermediate | White | Non-glutinous | NF | NF | F  |
| 1149 | C7149 | Intermediate | White | Non-glutinous | NF | NF | F  |
| 1152 | C7152 | Straw        | White | Non-glutinous | NF | NF | F  |
| 1179 | C7179 | Straw        | White | Glutinous     | NF | NF | NF |
| 1194 | C7194 | Straw        | White | Non-glutinous | NF | NF | F  |

<sup>a</sup> Accession number by Prof. Hamada

<sup>b</sup> Accession number in National Institute of Genetics.

<sup>c</sup> F: Functional allele. NF: Non-functional allele.

**Table S7.** Primer information for detecting loss-of-function mutations at *Bh4*, *Rc*, and *Waxy*.

| Locus       | Forward primer (5'-3') | Reverse primer (5'-3') | Mutation        | Allele size |                |
|-------------|------------------------|------------------------|-----------------|-------------|----------------|
|             |                        |                        |                 | Functional  | Non-functional |
| <i>Bh4</i>  | CAACCAGATGCTAGTGATATGC | AGGTTGAGCGTCACCTG      | 22-bp deletion  | 114 bp      | 92 bp          |
| <i>Rc</i>   | CAGAAACACCTGAATCAAGGG  | CTCTTTCAGCACATGGTTG    | 14-bp deletion  | 98 bp       | 84 bp          |
| <i>Waxy</i> | TGCAGAGATCTTCCACAGCA   | GCTGGTCGTCACGCTGAG     | 23-bp insertion | 196 bp      | 219 bp         |

**Table S8.** Comparison of the grain traits among five combinations of genotypes at four marker loci, GW2\_SNP, GS5\_InDel, GW6a\_InDel2, and GS3\_SNP1. SL: seed length, ST: seed thickness, BL: brown rice length, BT: brown rice thickness, and 100W: 100-seed weight. The values are averages  $\pm$  S.D.

| Genotype <sup>a</sup> |           |             |          | No.       | SL               | SW <sup>b</sup> | ST <sup>b</sup> | BL              | BW <sup>b</sup> | BT <sup>b</sup> | 100W <sup>b</sup> |
|-----------------------|-----------|-------------|----------|-----------|------------------|-----------------|-----------------|-----------------|-----------------|-----------------|-------------------|
| GW2_SNP               | GS5_InDel | GW6a_InDel2 | GS3_SNP1 | varieties | (mm)             | (mm)            | (mm)            | (mm)            | (mm)            | (mm)            | (g)               |
| 1                     | 1         | 1           | 2        | 12        | 10.17 $\pm$ 0.69 | 2.71 $\pm$ 0.38 | 2.05 $\pm$ 0.15 | 7.32 $\pm$ 0.59 | 2.28 $\pm$ 0.32 | 1.83 $\pm$ 0.13 | 3.08 $\pm$ 0.67   |
| 2                     | 1         | 1           | 2        | 14        | 9.76 $\pm$ 0.60  | 2.62 $\pm$ 0.19 | 2.02 $\pm$ 0.04 | 7.09 $\pm$ 0.43 | 2.23 $\pm$ 0.12 | 1.80 $\pm$ 0.04 | 2.76 $\pm$ 0.17   |
| 1                     | 2         | 1           | 2        | 4         | 10.12 $\pm$ 0.59 | 3.21 $\pm$ 0.20 | 2.18 $\pm$ 0.07 | 7.17 $\pm$ 0.47 | 2.64 $\pm$ 0.12 | 1.93 $\pm$ 0.06 | 3.44 $\pm$ 0.43   |
| 1                     | 1         | 2           | 2        | 14        | 10.10 $\pm$ 0.49 | 2.11 $\pm$ 0.18 | 2.02 $\pm$ 0.10 | 7.23 $\pm$ 0.38 | 1.80 $\pm$ 0.09 | 1.80 $\pm$ 0.09 | 2.70 $\pm$ 0.34   |
| 1                     | 1         | 1           | 1        | 7         | 8.97 $\pm$ 0.27  | 2.85 $\pm$ 0.40 | 2.09 $\pm$ 0.14 | 6.42 $\pm$ 0.32 | 2.42 $\pm$ 0.30 | 1.86 $\pm$ 0.11 | 2.72 $\pm$ 0.32   |
| All <sup>c</sup>      |           |             |          | 162       | 9.32 $\pm$ 0.34  | 2.68 $\pm$ 0.29 | 2.01 $\pm$ 0.12 | 6.69 $\pm$ 0.73 | 2.27 $\pm$ 0.23 | 1.79 $\pm$ 0.11 | 2.61 $\pm$ 0.48   |

<sup>a</sup> 1: Allele 1 (Nipponbare type), 2: Allele 2 (non-Nipponbare type). Cells of alleles with increasing effect of trait values are colored in pink.

<sup>b</sup> Cells of higher average values than "1112" are colored in yellow.

<sup>c</sup> Overall with 162 local varieties.
